# Supplementary material for: Spermidine is essential for fasting-mediated autophagy and longevity
Source: PubMed Central journal article supplement (PMC11392816; doi:10.1038/s41556-024-01468-x), 2024-08-08

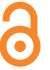

---

# Spermidine is essential for fasting-mediated autophagy and longevity

---

In the format provided by the authors and unedited

---

## Supplementary Material

### Table of Contents

- Figures S1-S6
- Uncropped Immunoblots for S5 and S6

## Supplementary Figures

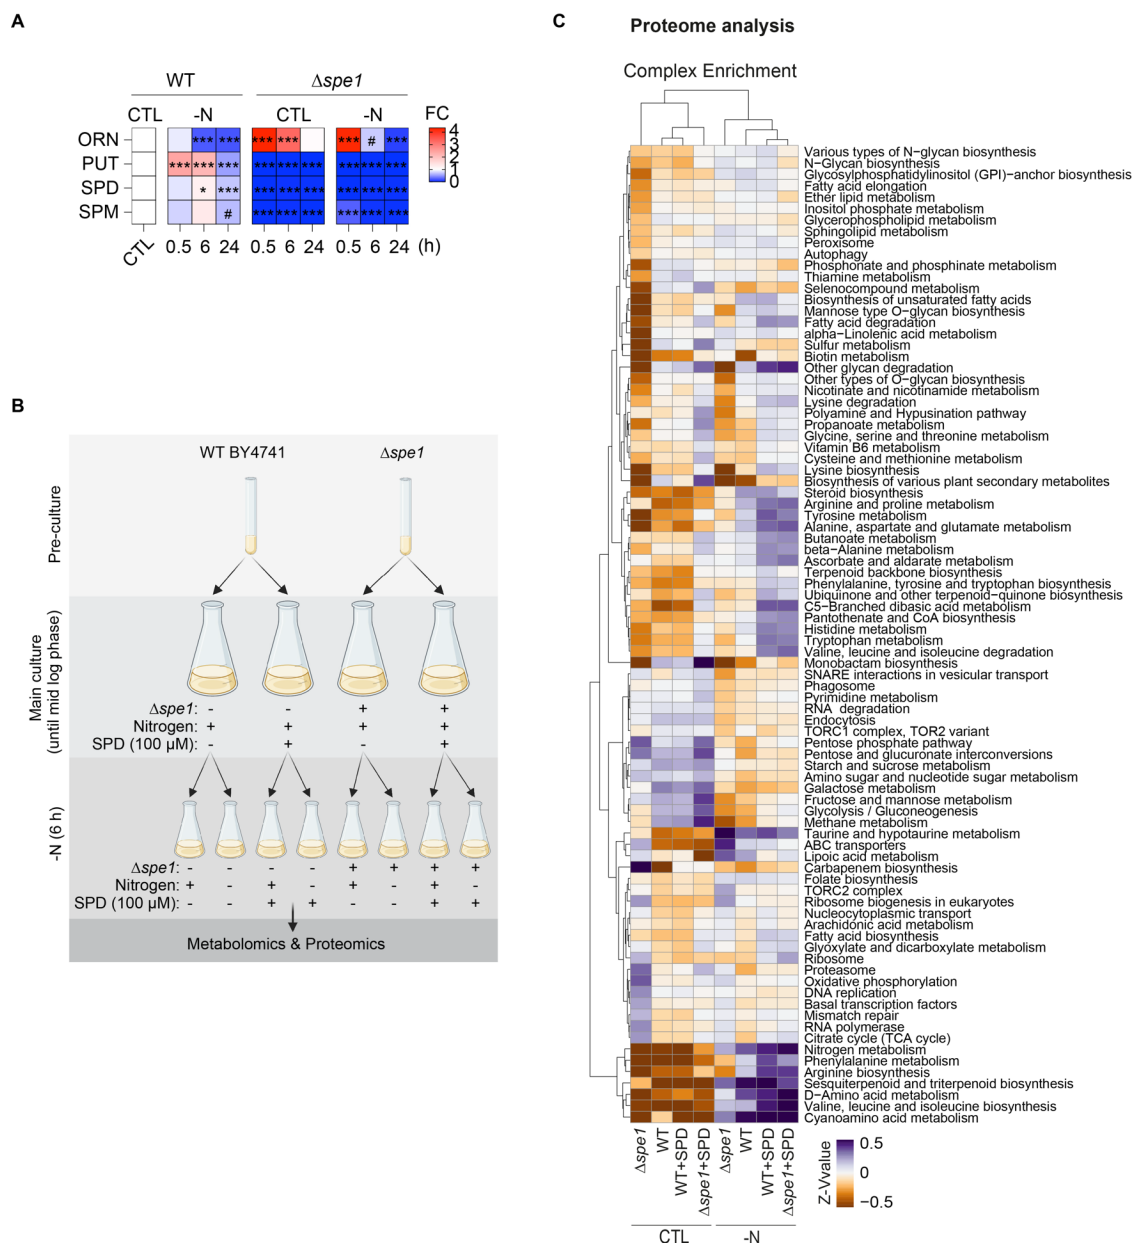

**Figure S1: Spermidine is required for correct proteomes during nitrogen starvation in yeast. (A)** Polyamine levels of BY4741 WT and  $\Delta spe1$  yeast shifted to -N for the indicated times. Data normalized to the mean of the control (CTL) condition at every time point. N=6 biologically independent samples (yeast cultures). Two-way ANOVA with Holm-Šidák's multiple comparisons test. Heatmap shows means. \*  $P < 0.05$ , \*\*  $P < 0.01$ , \*\*\*  $P < 0.001$ , #  $P < 0.2$ . **(B)** Experimental layout for the analysis of yeast metabolomes and proteomes. Figure created with Biorender.com **(C)** Protein complex enrichment analyses of yeast proteomes using all annotated yeast KEGG pathways as well as complex portal annotations of the TORC complex (CPX-1715, CPX-1716, CPX-1717) visualized with their referring Z-Values, resulting from absolute differential protein expression of the referring complexes. Complexes with a Z-Value  $> 0.2 / < -0.1$  displayed in a heatmap including a hierarchical clustering employing the Euclidean distance metric. N=6 biologically independent samples (yeast cultures). Source numerical data are available in source data.

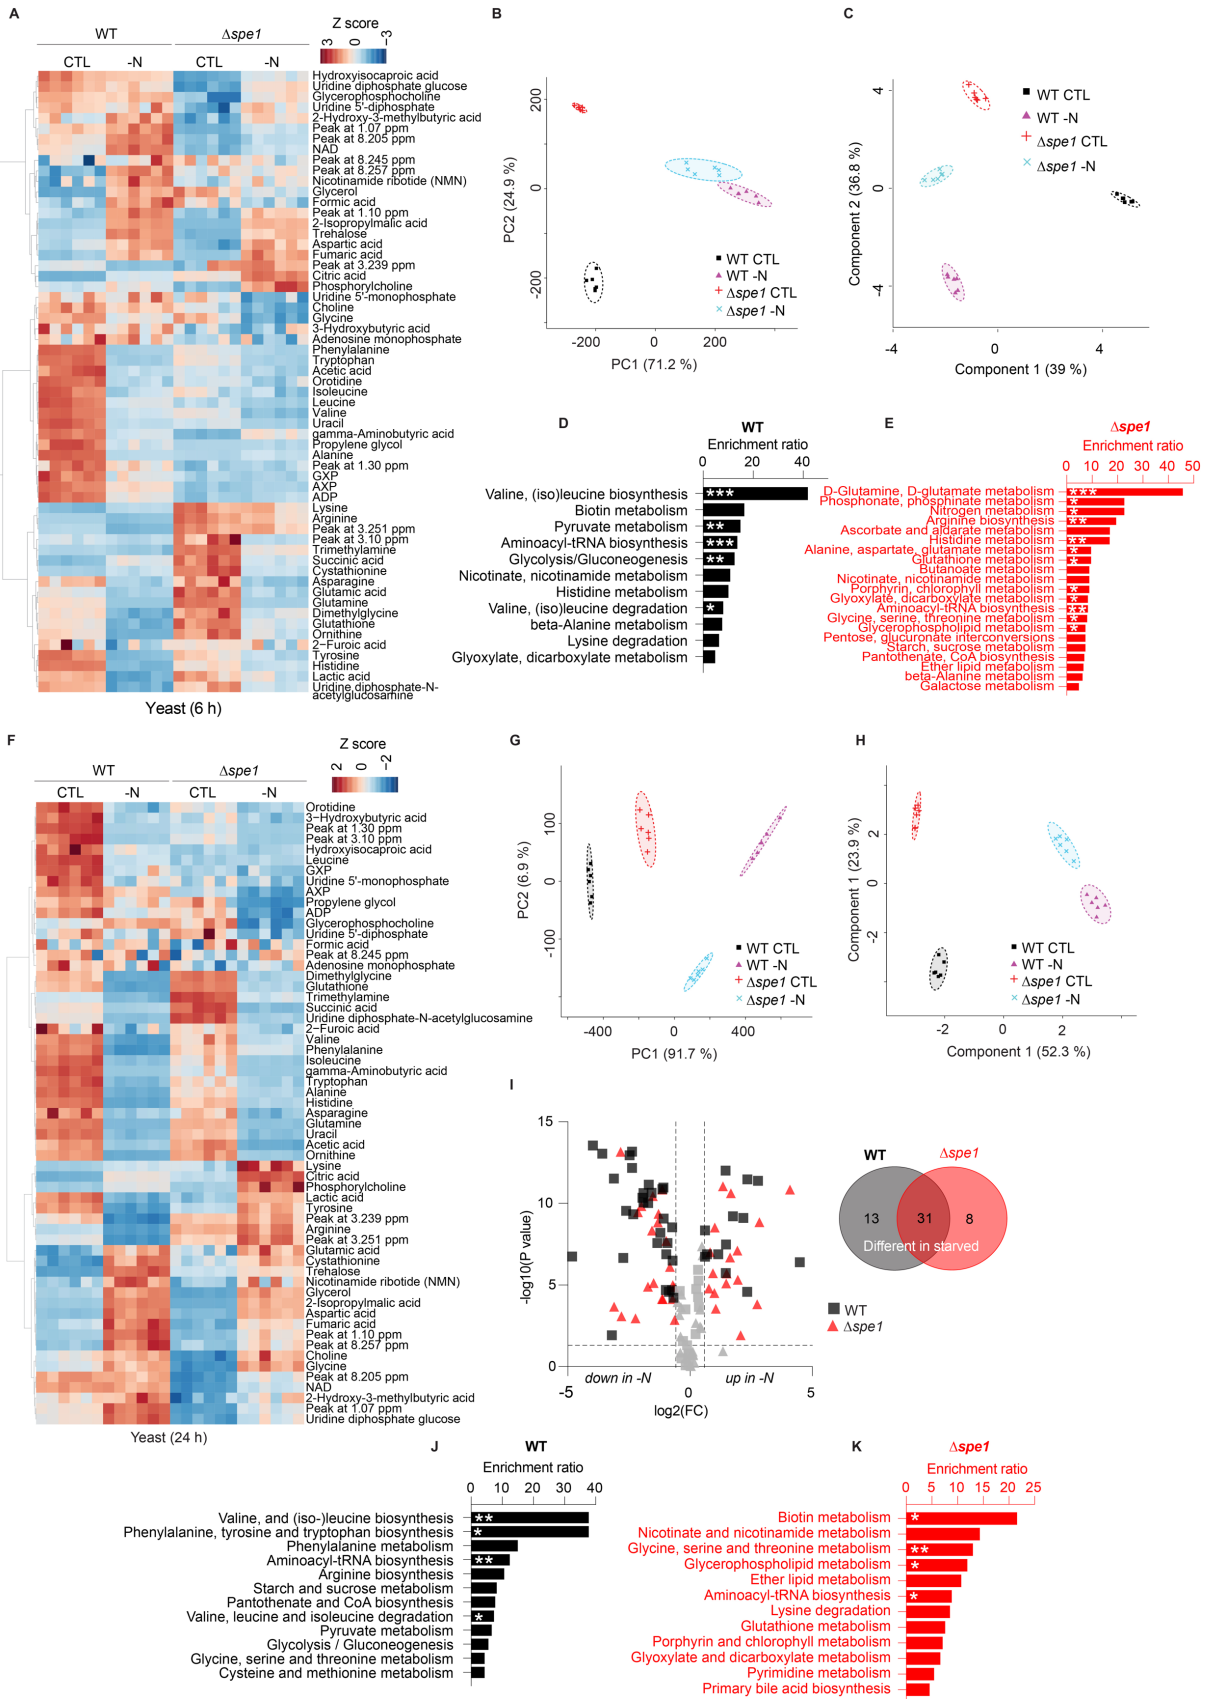

**Figure S2: Metabolomic analysis by NMR spectroscopy reveals prominent differences between WT and  $\Delta spe1$  yeast strains after 6 and 24 hours of nitrogen deprivation. (A-B) Heatmap and principal component (PC) analysis of yeast WT and**

$\Delta spe1$  metabolomes after 6 hours -N. Unassigned NMR signals are labeled according to their NMR chemical shift. N=4 biologically independent samples (yeast cultures). **(C)** Sparse Partial Least Squares Discriminant Analysis (sPLS-DA) of yeast WT and  $\Delta spe1$  metabolomes after 6 hours -N. N=4 biologically independent samples (yeast cultures). **(D-E)** Metabolite set enrichment analysis based on KEGG pathways of exclusive metabolites from [Fig. 2D] (raw  $P$ -values  $<0.2$ ). **(F-G)** Heatmap and principal component (PC) analysis of *S. cerevisiae* WT and  $\Delta spe1$  metabolomes after 24 hours -N. Unassigned NMR signals are labeled according to their NMR chemical shift. N=4 biologically independent samples (yeast cultures). **(H)** Sparse Partial Least Squares Discriminant Analysis (sPLS-DA) of *S. cerevisiae* WT and  $\Delta spe1$  metabolomes after 24 hours -N. N=4 biologically independent samples (yeast cultures). **(I)** Volcano plot showing significantly different metabolites in WT or  $\Delta spe1$  after 24 hours -N compared to the control medium. Venn diagram showing exclusive and overlapping significantly regulated metabolites. Two-tailed Student's  $t$ -tests with FDR-corrected  $P$ -values  $<0.05$ , FC (fold change)  $>1.5$ . N=4 biologically independent samples (yeast cultures). **(J-K)** Metabolite set enrichment analysis based on KEGG pathways of exclusive metabolites from [D] (raw  $P$ -values  $<0.2$ ). Statistics: Asterisks indicate raw  $P$ -values. \* $<0.05$ , \*\* $<0.01$ , \*\*\* $<0.001$ . Source numerical data are available in source data.

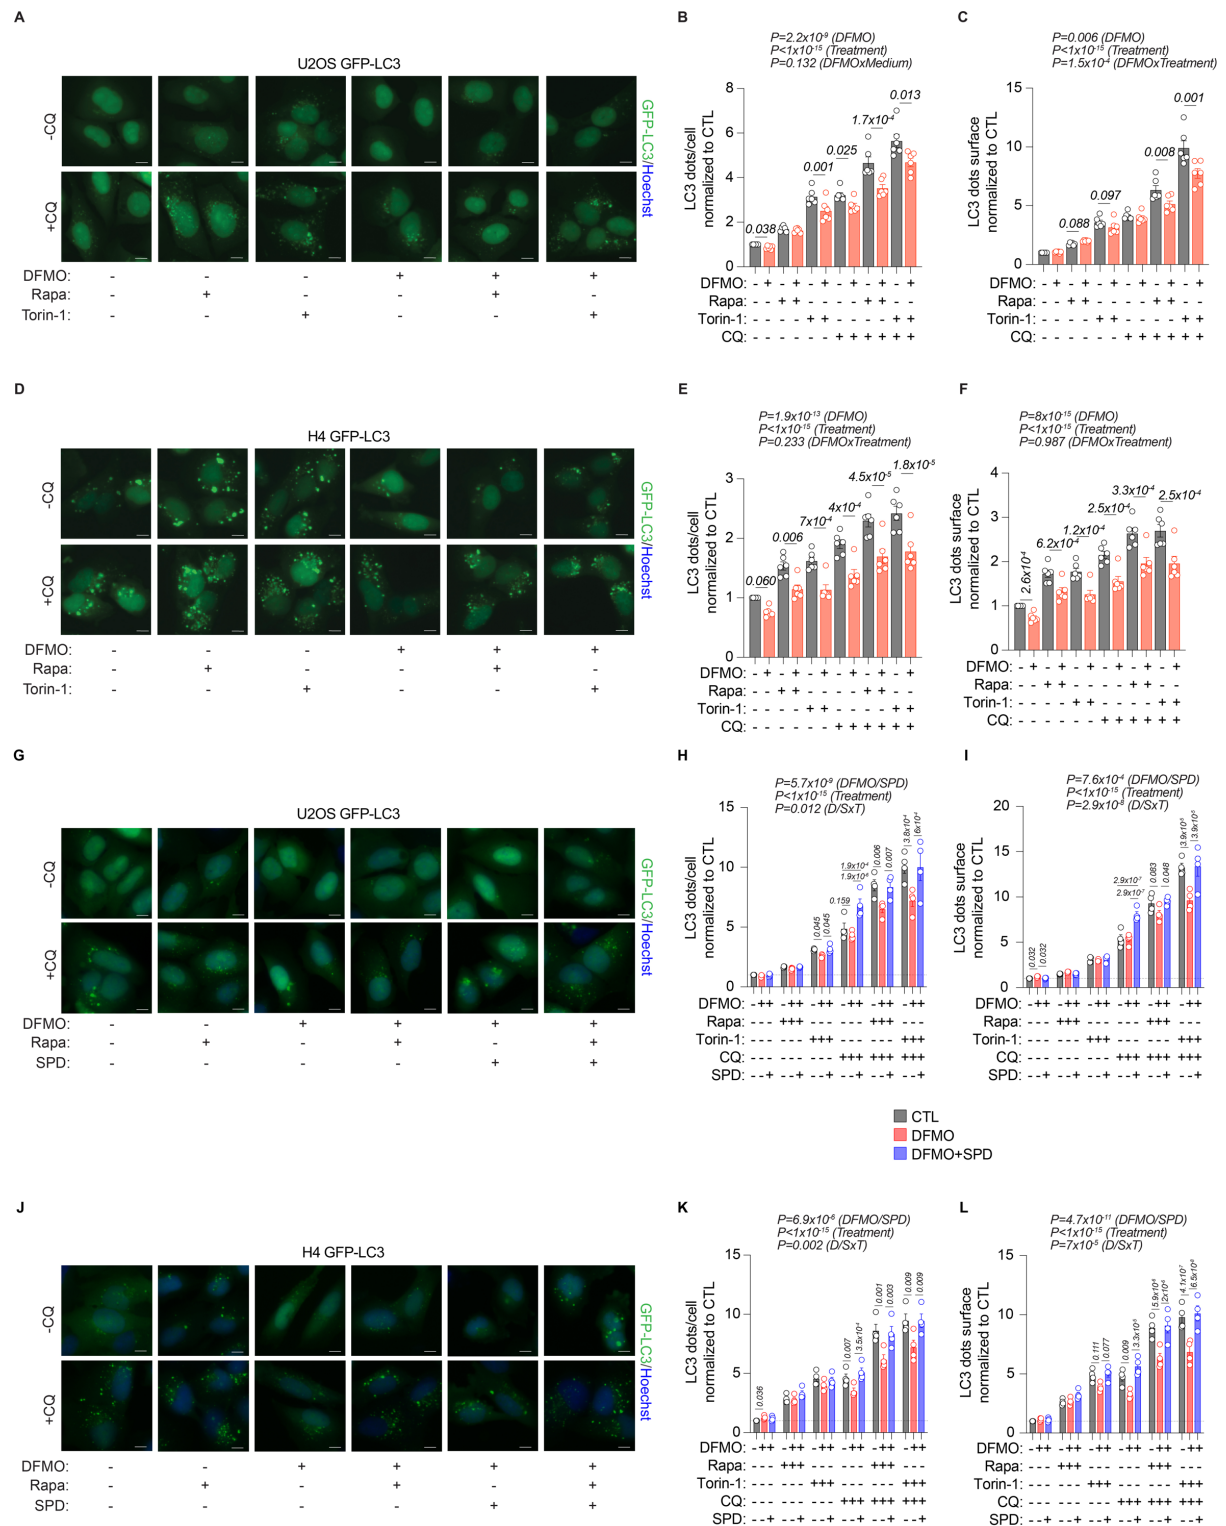

**Figure S3: Spermidine is required for rapamycin-induced autophagy in human cell lines.** (A) Representative images of U2OS GFP-LC3 cells treated with rapamycin (10  $\mu$ M) or Torin-1 (300 nM) for 6 hours (with or without chloroquine [CQ] for 3 hours before fixation) after 3 days of 100  $\mu$ M DFMO treatment. (B-C) Quantifications of [A]. N=6 biologically independent experiments. (D) Representative images of H4 GFP-LC3 cells treated with rapamycin (10  $\mu$ M) or Torin-1 (300 nM) for 6 hours (with or without chloroquine [CQ] for 3 hours before fixation) after three days of 100  $\mu$ M DFMO treatment.

Scale bar = 10  $\mu\text{m}$ . **(E-F)** Quantifications of [D]. N=6 biologically independent experiments. **(G-I)** Representative images and quantifications of U2OS GFP-LC3 cells treated as in [A-C], combined with 10  $\mu\text{M}$  SPD. 1 mM aminoguanidine was added to all conditions. N=4 biologically independent experiments. **(J-L)** Representative images and quantifications of H4 GFP-LC3 cells treated as in [A-C], combined with 10  $\mu\text{M}$  SPD. 1 mM aminoguanidine was added to all conditions. N=4 biologically independent experiments. Statistics: Two-way ANOVA with Holm-Šídák's multiple comparisons test. Bar graphs show the mean  $\pm$  S.E.M. Source numerical data are available in source data.

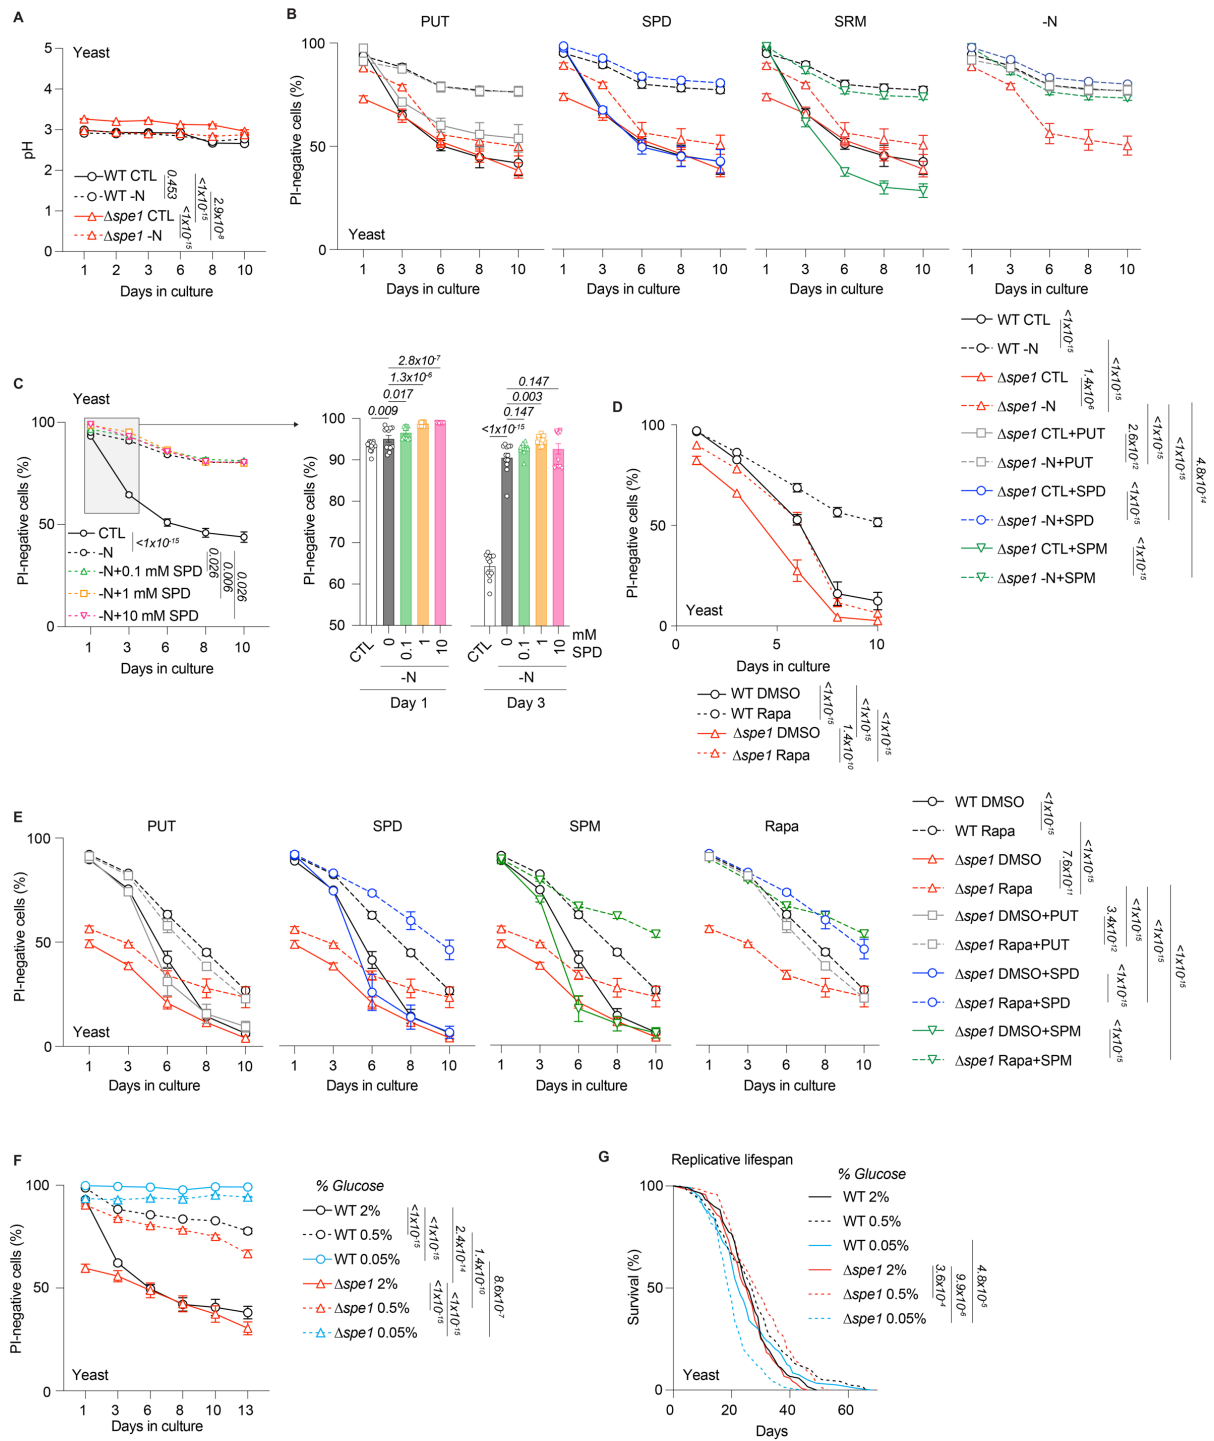

**Figure S4: Spermidine is required for lifespan extension in yeast. (A)** pH of the culture during chronological aging of WT BY4741 and  $\Delta spe1$  yeast in control and -N media. N=8 biologically independent samples (yeast cultures). **(B)** Polyamine (100  $\mu$ M) supplementation reinstates lifespan extension by -N in BY4741  $\Delta spe1$  yeast cells. N=8(WT -N;  $\Delta spe1$  -N;  $\Delta spe1$ +PUT,  $\Delta spe1$ +SPD -N;  $\Delta spe1$ +SPM -N), 9(WT,  $\Delta spe1$ ,  $\Delta spe1$ +PUT -N;  $\Delta spe1$ +SPD;  $\Delta spe1$ +SPM) biologically independent samples (yeast cultures). **(C)** PI-negative (live) cells during chronological aging of yeast BY4741 WT and  $\Delta spe1$  in control or -N media in combination with ascending SPD concentrations. N=12 biologically independent samples (yeast cultures). **(D)** Propidium iodide (PI)-negative



(live) cells during chronological aging of yeast BY4742 WT and  $\Delta spe1$  treated with DMSO or rapamycin (40 nM) in the logarithmic growth phase. N=11 biologically independent samples (yeast cultures). **(E)** Polyamine supplementation (100  $\mu$ M) normalizes rapamycin-induced (40 nM) lifespan extension in yeast BY4742  $\Delta spe1$ . N=9 biologically independent samples (yeast cultures). **(F)** PI-negative (live) cells during chronological aging of yeast BY4741 WT and  $\Delta spe1$  under glucose-restricted conditions (0.5 and 0.05 %) compared to control conditions (2 % glucose). N=10 biologically independent samples (yeast cultures). **(G)** Replicative lifespan of BY4741 WT and  $\Delta spe1$  under glucose-restricted conditions (0.5 and 0.05 %) compared to control conditions (2 % glucose). N=120 yeast cells. Statistics: [A-F] Two-way ANOVA with Holm-Šídák's multiple comparisons test. [C – single day analyses] One-way ANOVA with Holm-Šídák's multiple comparisons test. [G] Log-rank test with Bonferroni correction. Bar and line graphs show the mean  $\pm$  S.E.M. Source numerical data are available in source data.

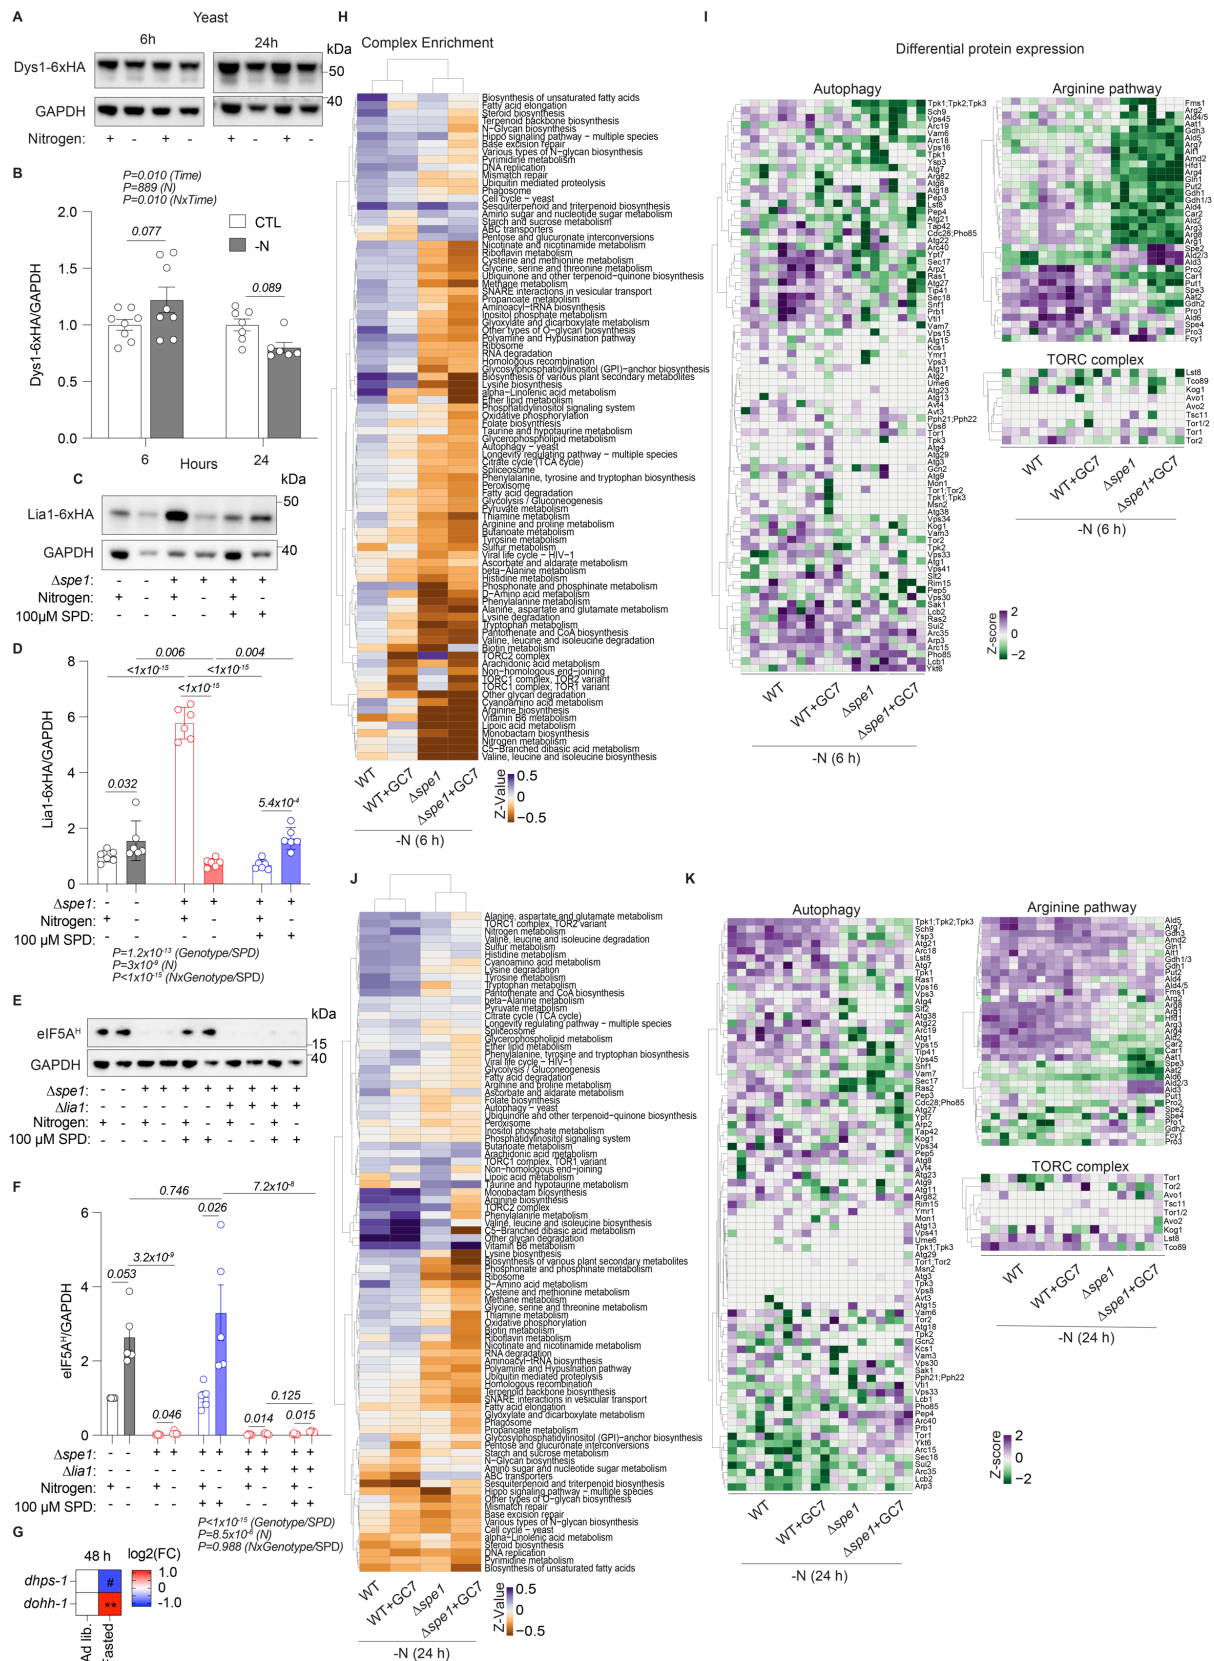

**Figure S5: Fasting increases hypusination enzymes, which are required for correct TOR signaling, autophagy, and translation processes during nitrogen deprivation in yeast. (A)** Representative immunoblot of yeast Dys-6xHA, assessed for HA-tags and GAPDH after 6 and 24 hours -N. **(B)** Quantification of Dys-6xHA levels as depicted in [A].

N 8(6 hours), 7(24 hours CTL), 6 (24 hours -N) biologically independent samples (yeast cultures). **(C)** Representative immunoblot of yeast Lia1-6xHA, assessed for HA-tags and GAPDH after 6 -N in WT and  $\Delta spe1$  cells with and without 100  $\mu$ M SPD. **(D)** Quantification of Lia1-6xHA levels as depicted in [C]. N=6 biologically independent samples (yeast cultures). **(E)** Representative immunoblot of yeast WT,  $\Delta spe1$  and  $\Delta spe1\Delta lia1$ , assessed for hypusine and GAPDH after 6 hours -N in WT and  $\Delta spe1$  cells with and without 100  $\mu$ M SPD. **(F)** Quantification of eIF5A<sup>H</sup> levels as depicted in [E]. N=5 biologically independent samples (yeast cultures). **(G)** Quantification of relative mRNA expression of *dhps-1* and *dohh-1* in 48 hours fasted *C. elegans*. N=4(*dohh-1*), 5(*dhps-1*) biologically independent experiments. **(H-K)** Proteome changes in *S. cerevisiae* WT and  $\Delta spe1$  strains under indicated conditions following a **(H+I)** 6 hour or **(J+K)** 24-hour treatment in -N. N=8(WT), 4(rest) biologically independent samples (yeast cultures). Protein complex analyses using all annotated yeast KEGG pathways as well as complex portal annotations of the TORC complex (CPX-1715, CPX-1716, CPX-1717) visualized in a heatmap with their referring Z-Value at **(H)** 6 hours and **(J)** 24 hours. Complexes with a Z-Value >0.2/<-0.2 are shown in the heatmap, including a hierarchical clustering employing the Euclidean distance metric. Differential expression (Z score) of proteins at **(I)** 6 hours and **(K)** 24 hours involved in autophagy, arginine pathway, and TORC complex are displayed. Statistics: [B,D,F] Two-way ANOVA with Holm-Šidák's multiple comparisons test. [G] Two-tailed Student's *t*-test with Holm-Šidák's multiple comparisons test. Heatmaps show means. Bar graphs show the mean  $\pm$  S.E.M. \*  $P < 0.05$ , \*\*  $P < 0.01$ , #  $P < 0.2$ . Source numerical data and unprocessed blots are available in source data. Proteome source numerical data are available in the PRIDE repository.

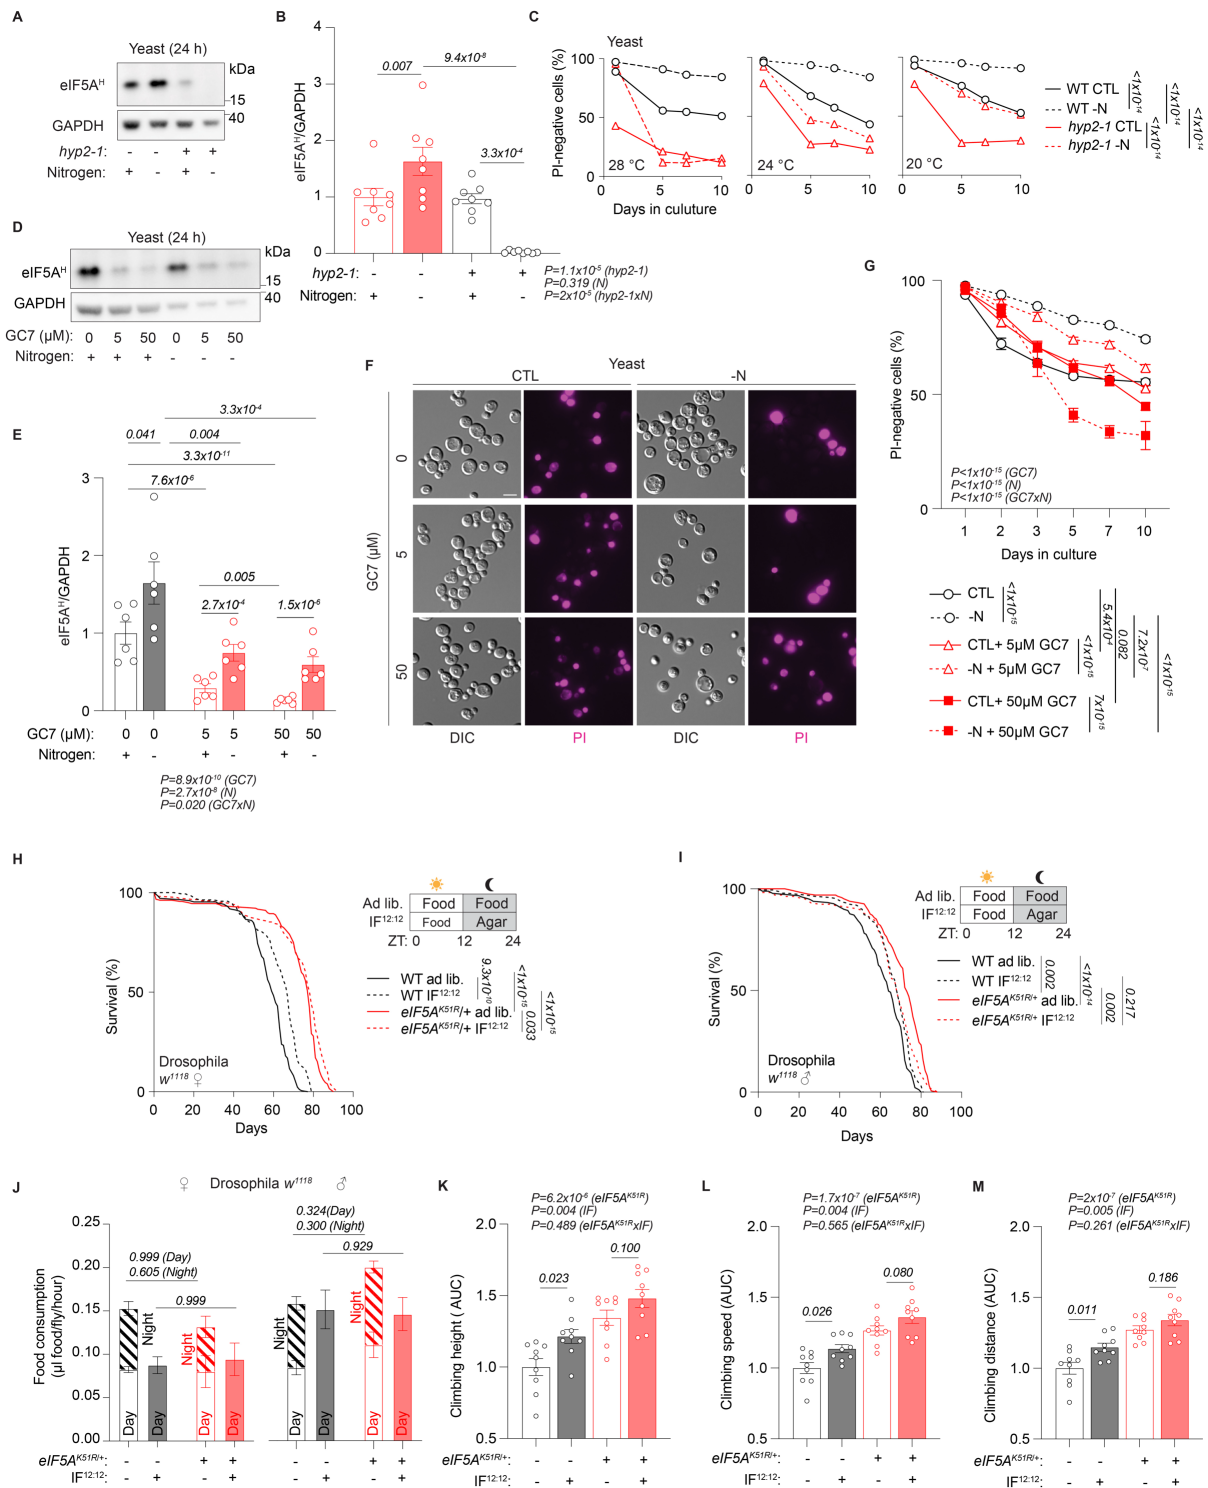

**Figure S6: Genetic or pharmacological inhibition of hypusination in yeast or *Drosophila* curtails survival under nitrogen deprivation or IF. (A)** Representative immunoblot of yeast WT and *hyp2-1*, assessed for hypusine and GAPDH after 24 hours -N. **(B)** Quantification of hypusine levels as depicted in [A]. N=8 biologically independent samples (yeast cultures). **(C)** Chronological aging of yeast WT and *hyp2-1* (temperature-sensitive mutant, *hyp2* = eIF5A homolog) in CTL and -N medium at different temperatures. N=8 biologically independent samples (yeast cultures). **(D)** Representative immunoblot of yeast cells treated with 5 or 50 μM GC7, assessed for

hypusine and GAPDH after 24 hours -N. **(E)** Quantification of hypusine levels as depicted in [D]. N=6 biologically independent samples (yeast cultures). **(F)** Representative images on day 5 of chronological aging experiments of yeast WT cells treated with 5 or 50  $\mu$ M GC7, stained with PI and quantified in [G]. Scale bar = 5  $\mu$ m. **(G)** GC7 treatment reduces survival, measured as PI-negative cells (live), of yeast WT cells in -N. N = 8(day 10), 19(CTL+50 $\mu$ M d5/d7, 18(-N d7), 20(rest). **(H-I)** Lifespan of isogenic female and male *w<sup>1118</sup>* flies and heterozygous *eIF5A<sup>K51R/+</sup>* flies during IF<sup>12:12</sup>. **(H)** Lifespan analysis of female flies. N=173(WT ad lib.), 168(WT IF), 183(*eIF5A<sup>K51R/+</sup>* ad lib.), 175(*eIF5A<sup>K51R/+</sup>* IF) flies. **(I)** Lifespan analysis of male flies. N=180(WT ad lib.), 191(WT IF), 168(*eIF5A<sup>K51R/+</sup>* ad lib.), 166 (*eIF5A<sup>K51R/+</sup>* IF) flies. **(J)** Food consumption of 10-day old female and male flies during the first 7 cycles of IF. N=9(WT, *eIF5A<sup>K51R/+</sup>* IF Day), 6(*eIF5A<sup>K51R/+</sup>* ad lib. Day, *eIF5A<sup>K51R/+</sup>* ad lib. Night) biologically independent samples (groups of 5 flies per N). **(K-M)** Flies from [H] were assessed for their climbing ability, measured as reached height, speed, and covered walking distance after a negative geotaxis stimulus, on day 35 of the IF<sup>12:12</sup> aging experiments. N=9 biologically independent samples (groups of flies). Statistics: [B-E,G,K-M] Two-way ANOVA with Holm-Šídák's multiple comparisons test. [H,I] Log-rank test with Bonferroni correction. [J] Two-tailed unpaired Student's *t*-test. Bar and line graphs show the mean  $\pm$  S.E.M. Source numerical data and unprocessed blots are available in source data.

## Uncropped Immunoblots for Supplementary Figures

Figure S5A

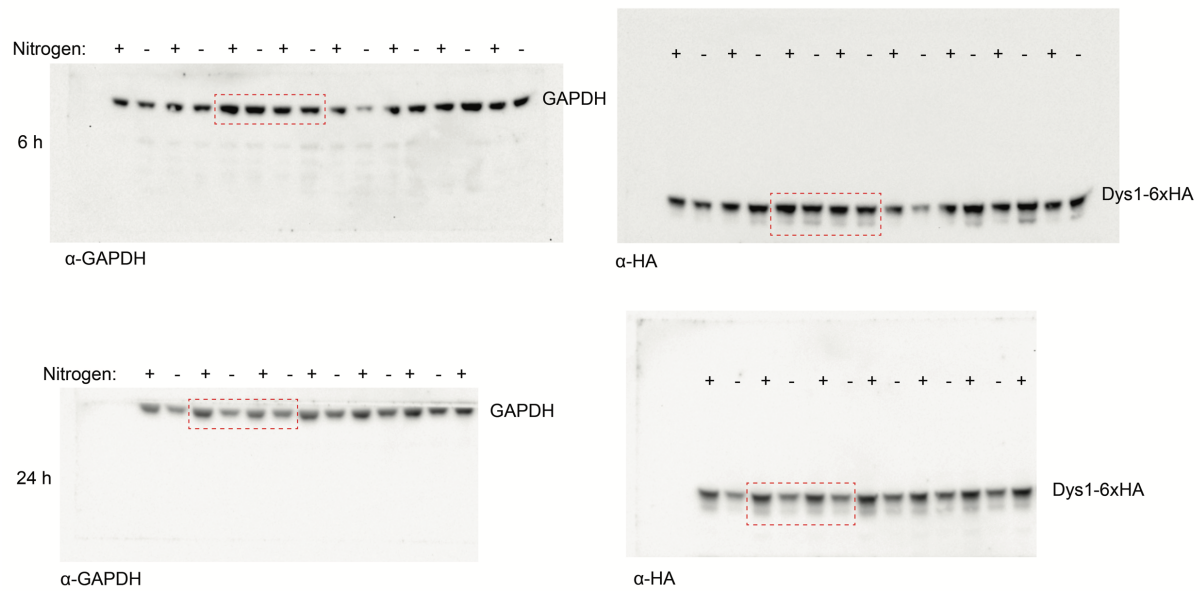

Figure S5C

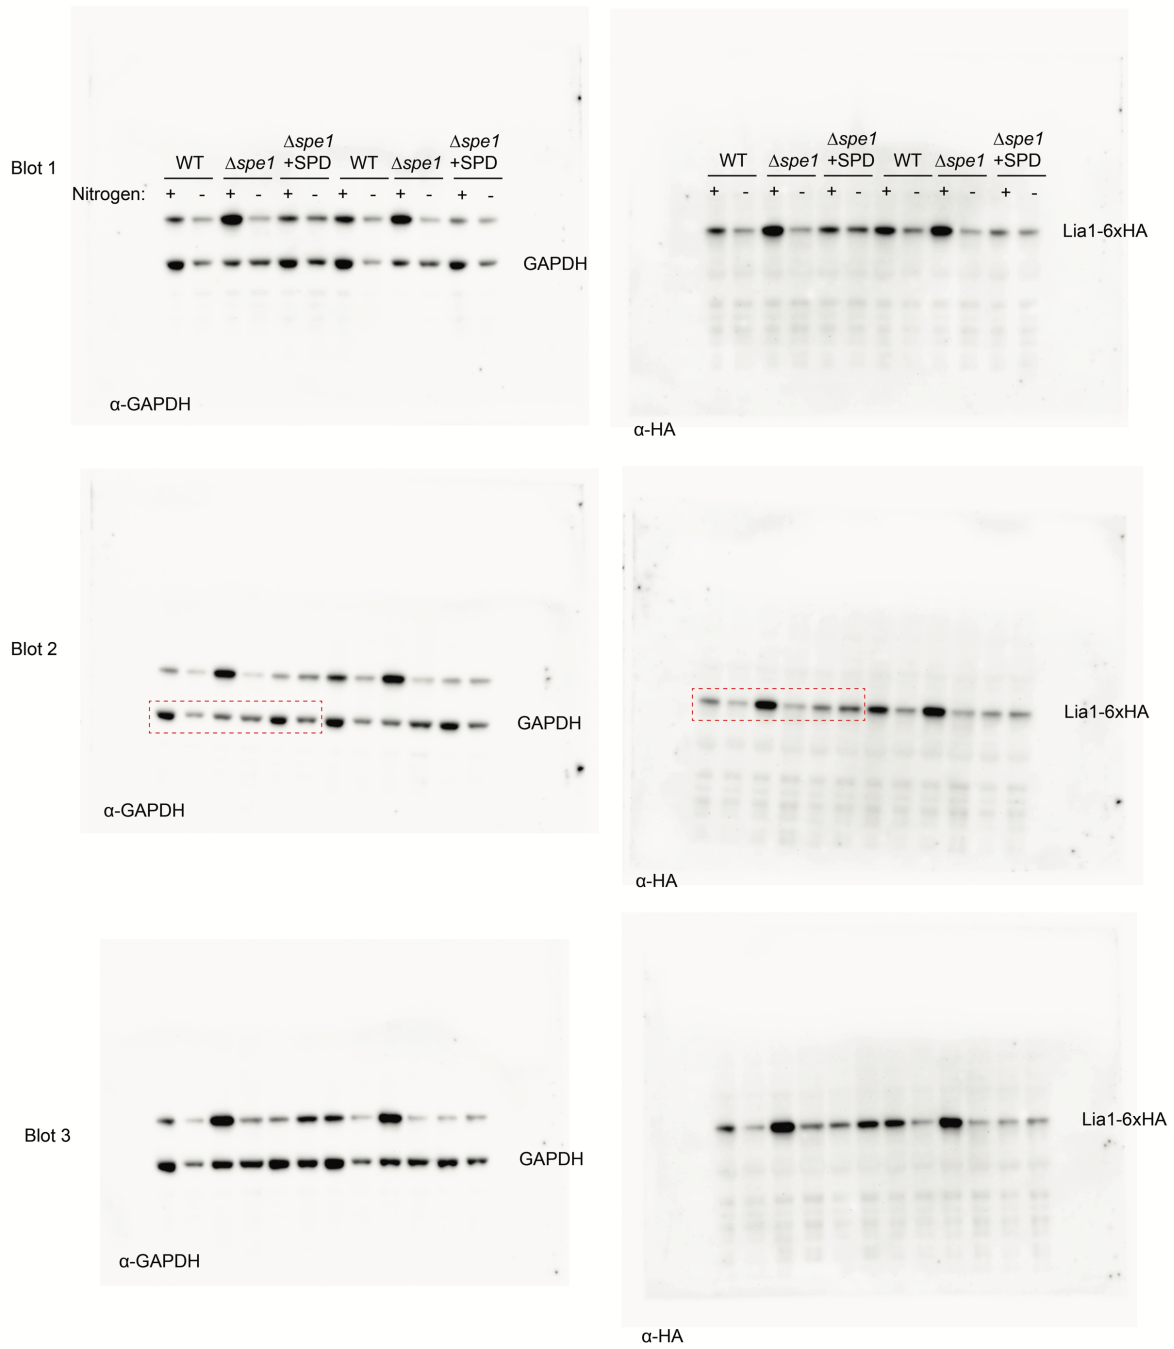

**Figure S5E**

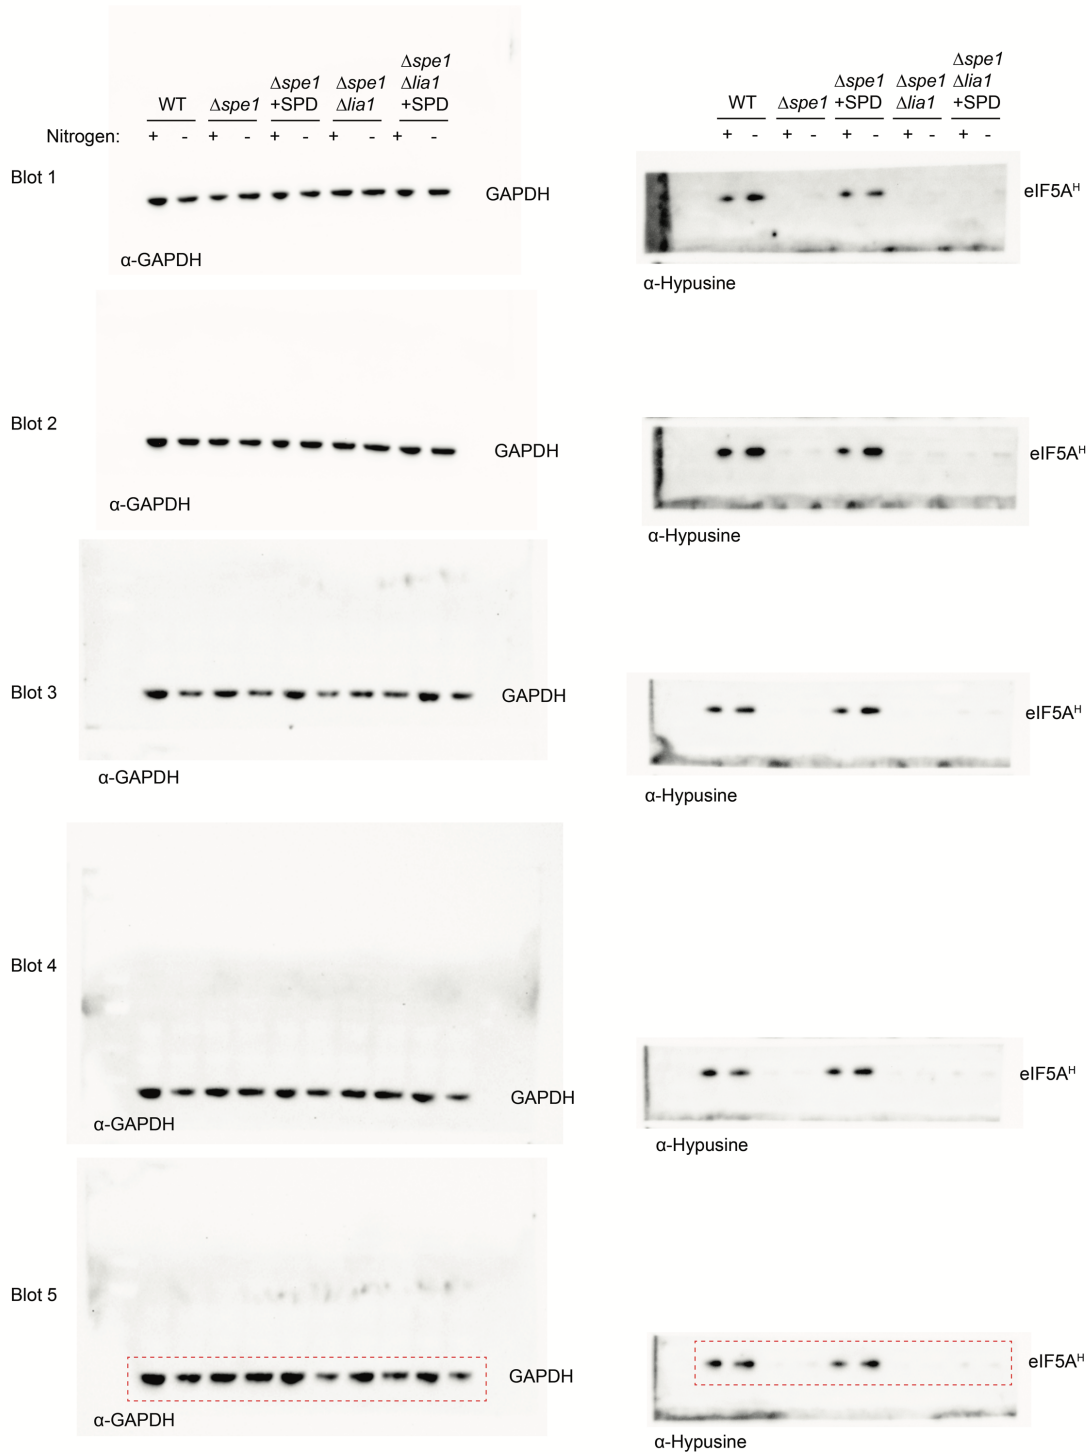



**Figure S6A**

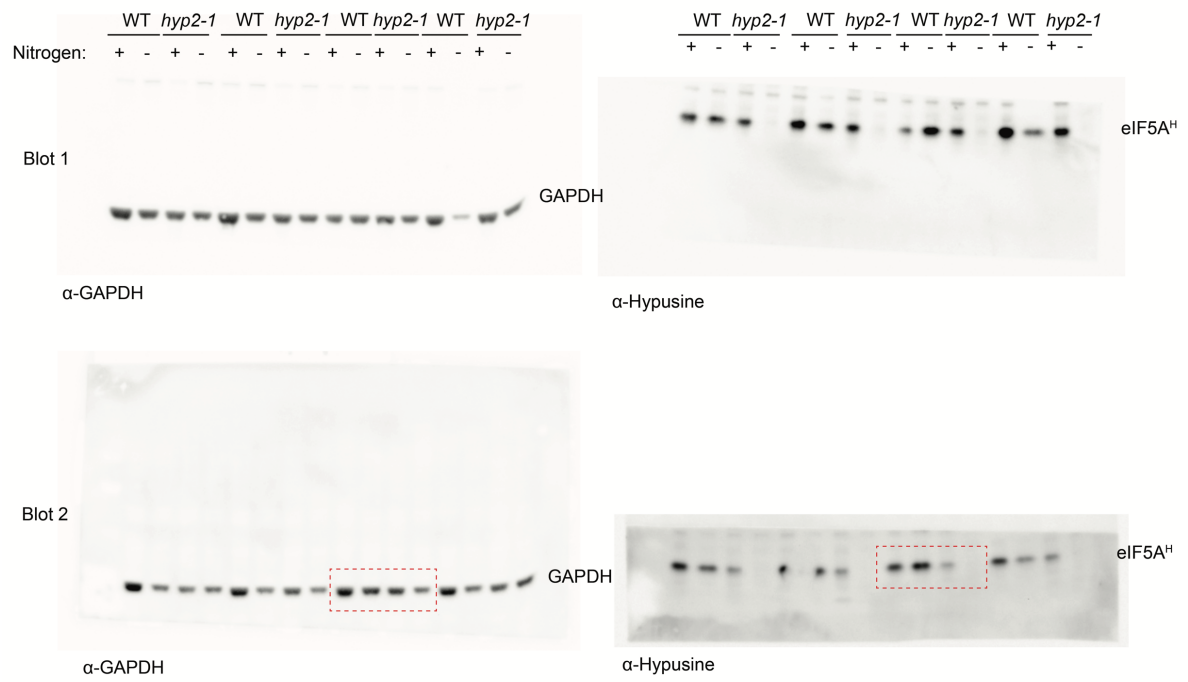

**Figure S6D**

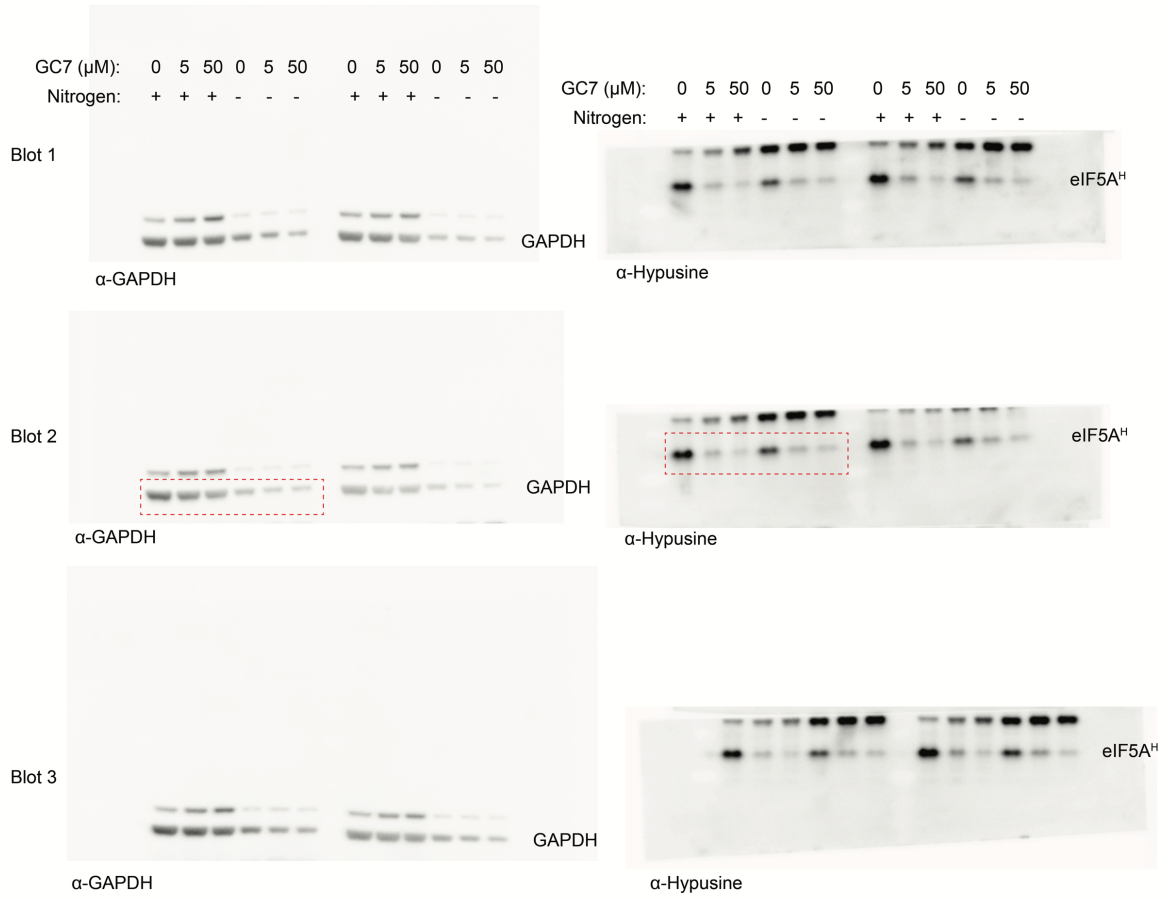

Supplement: 41556_2024_1468_MOESM1_ESM.pdf [file 41556_2024_1468_MOESM1_ESM.pdf]
