# Supplementary material for: Spermidine is essential for fasting-mediated autophagy and longevity
Source: PubMed Central journal article supplement (PMC11392816; doi:10.1038/s41556-024-01468-x), 2024-08-08
Supplement: 41556_2024_1468_MOESM14_ESM.pdf [file 41556_2024_1468_MOESM14_ESM.pdf]

**Figure 3A**

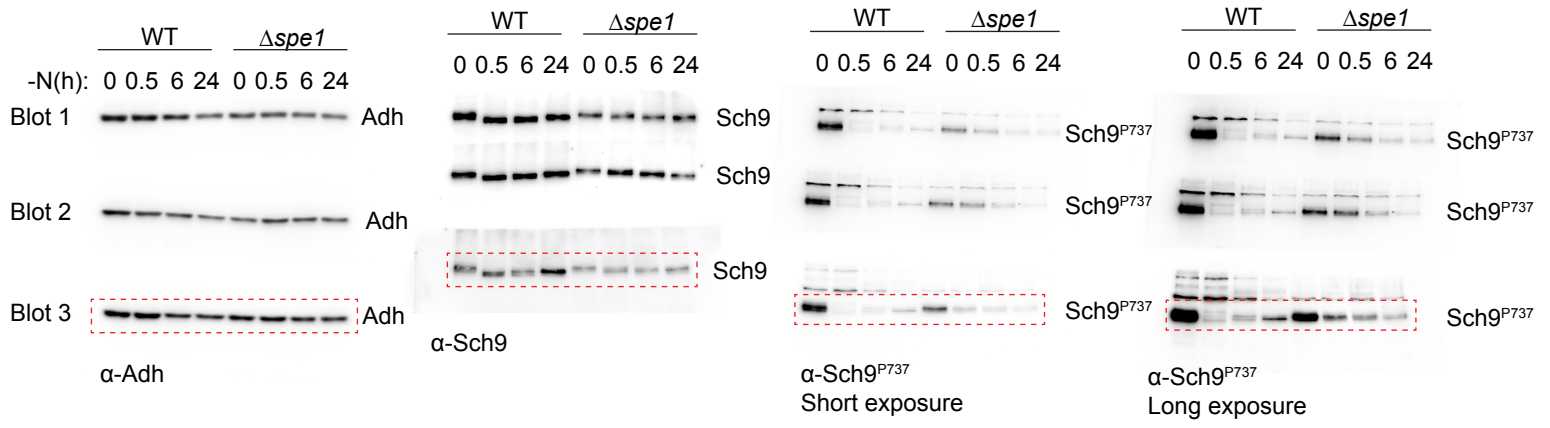

**Figure 3D**

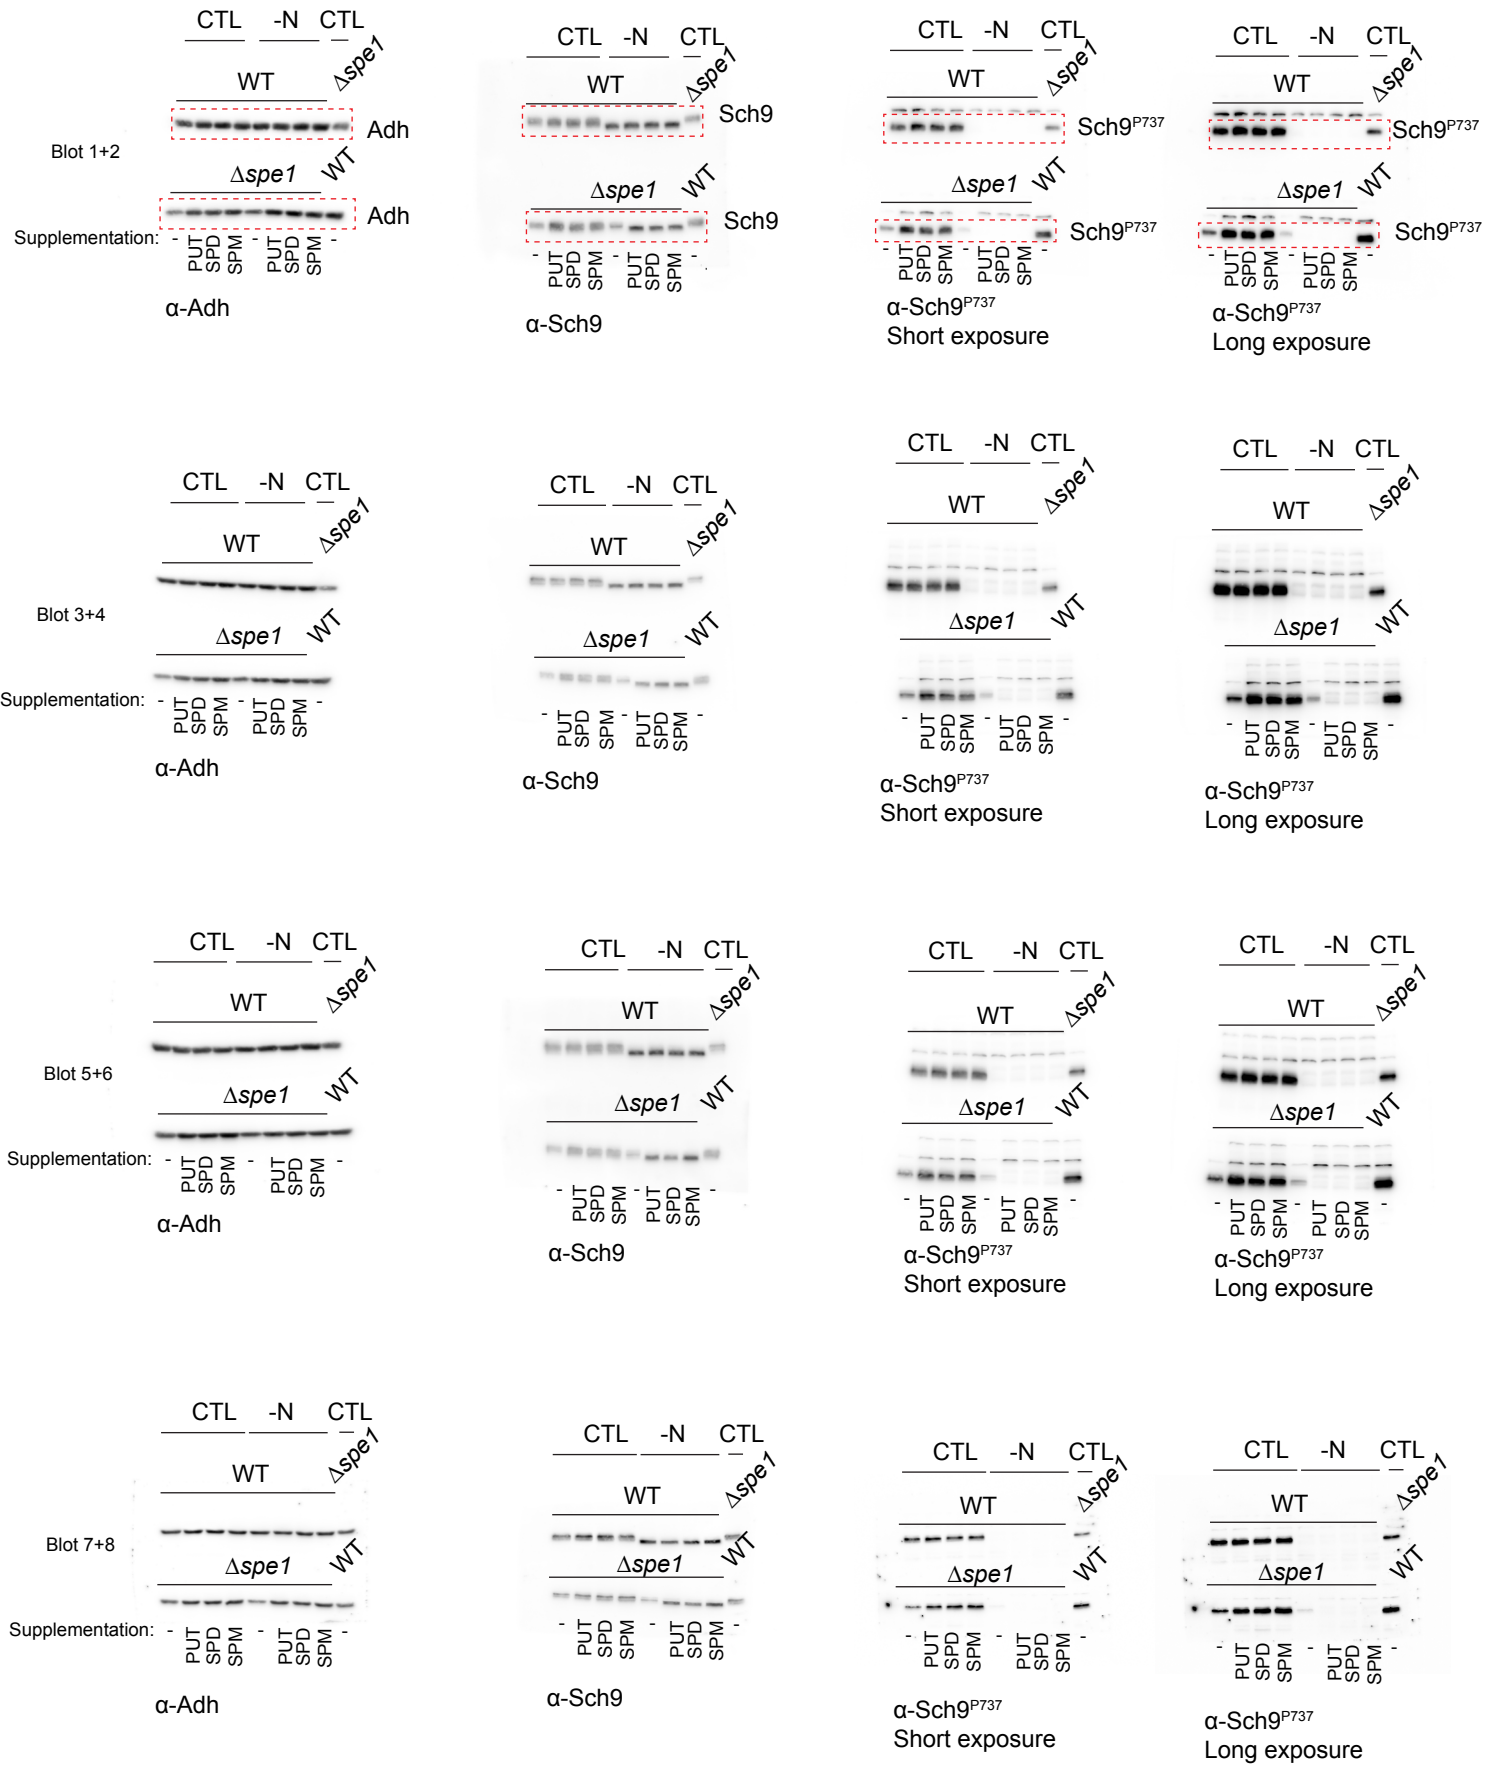

**Figure 3E**

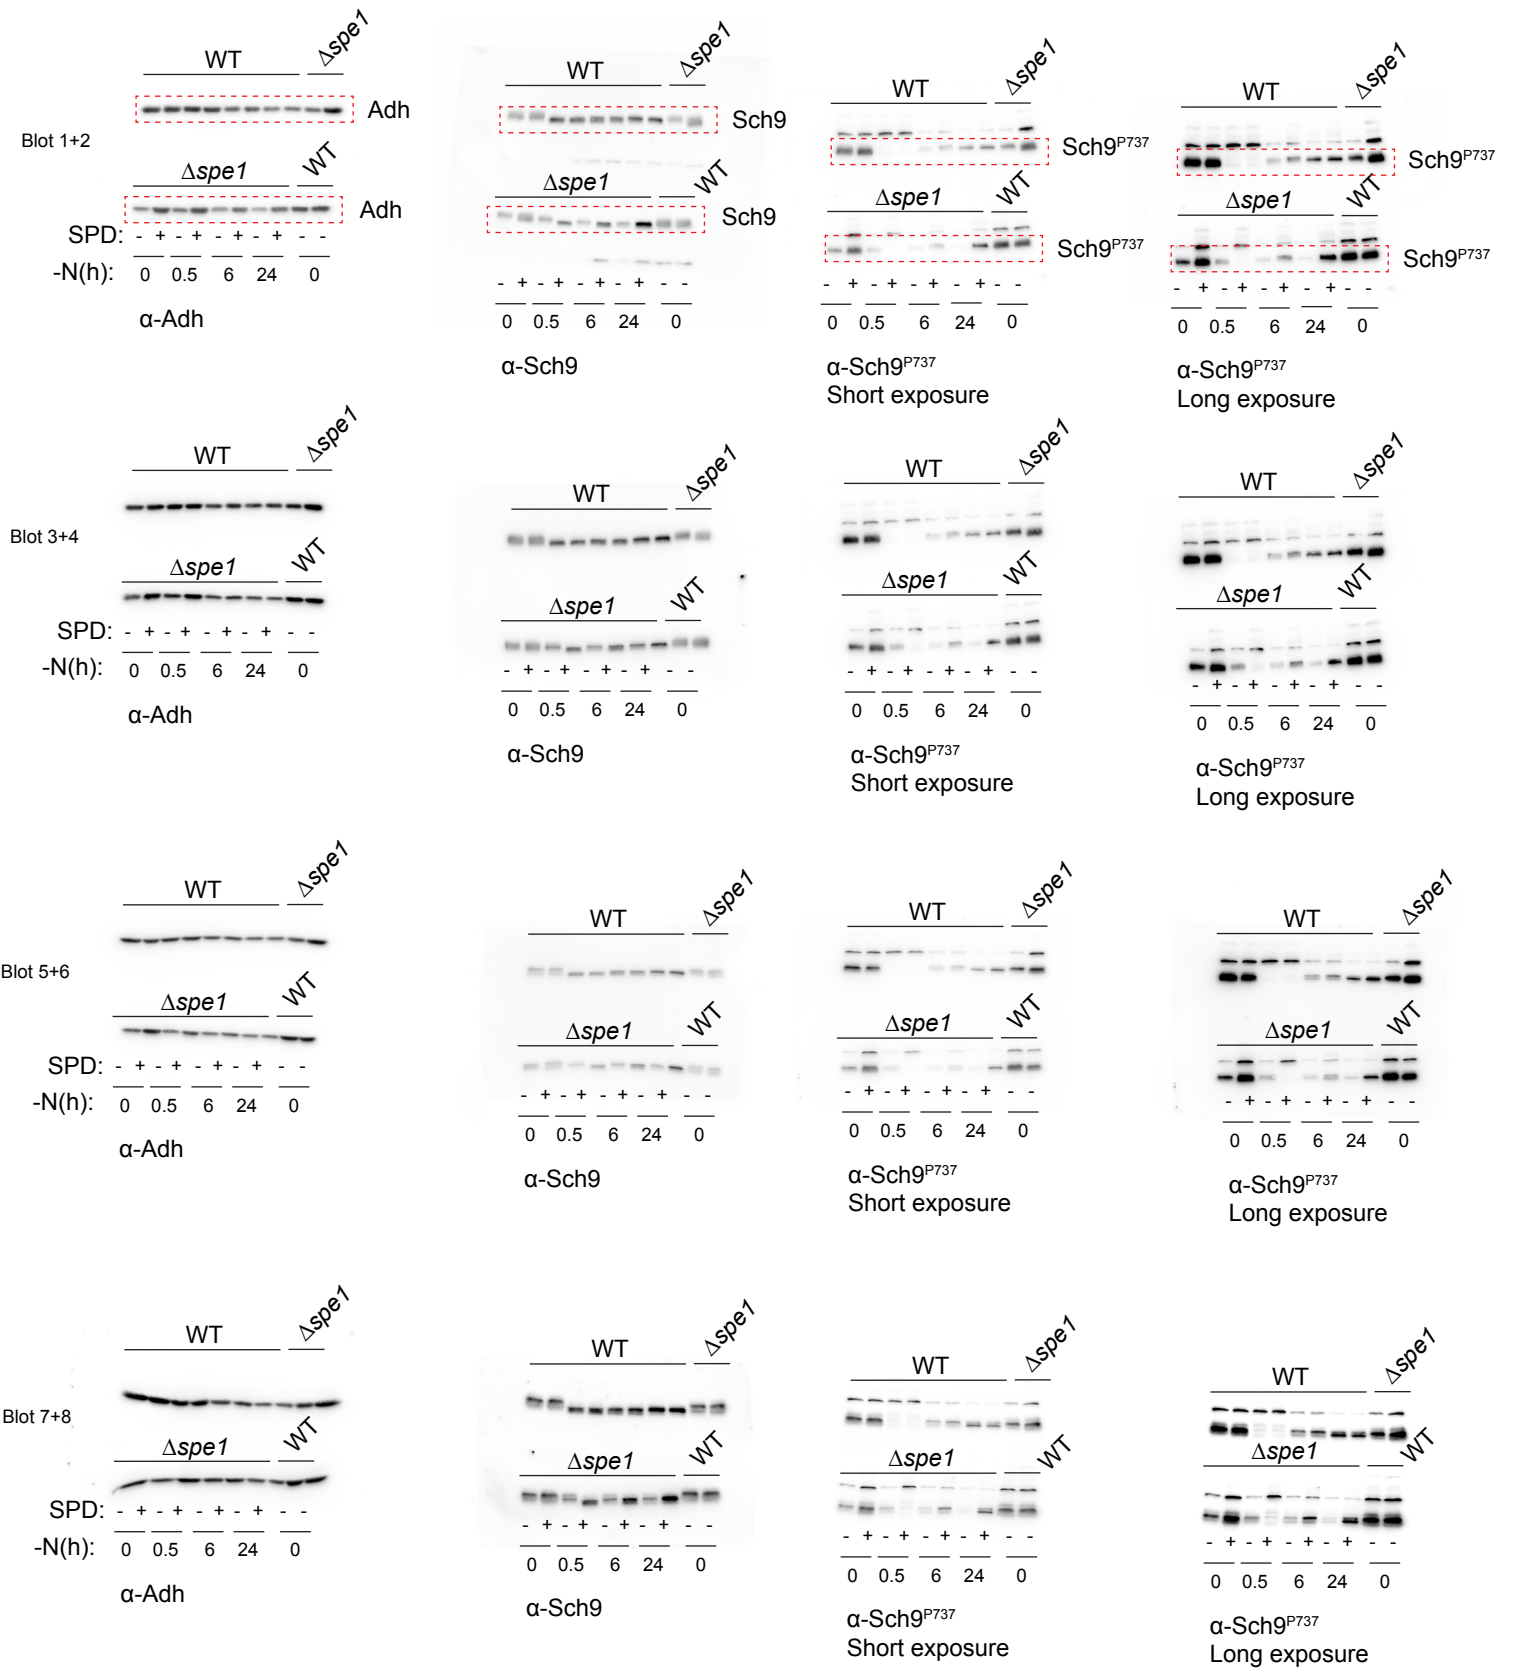

**Figure 3H**

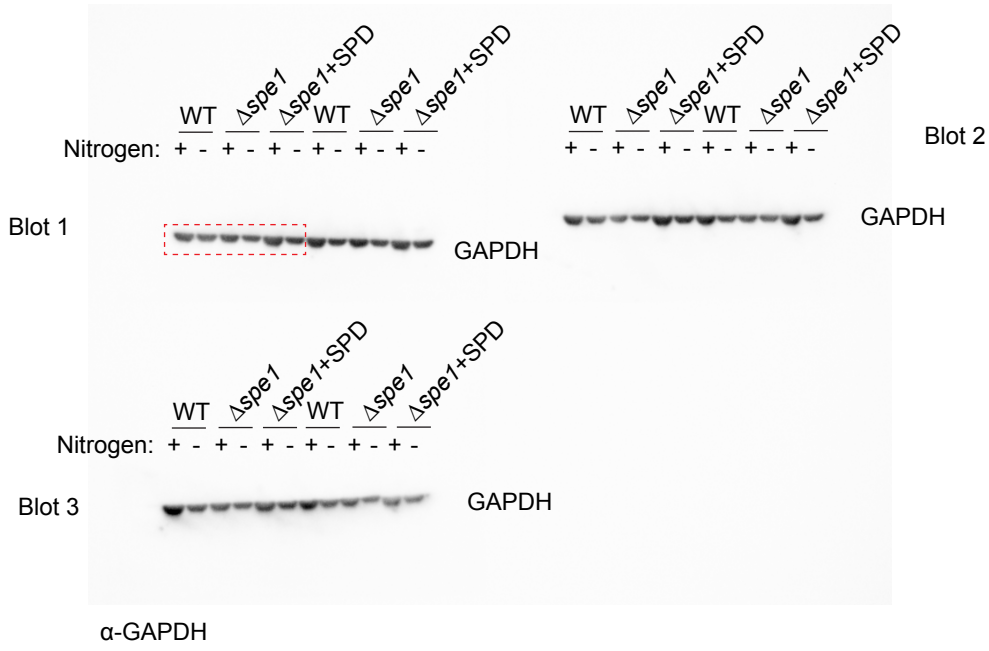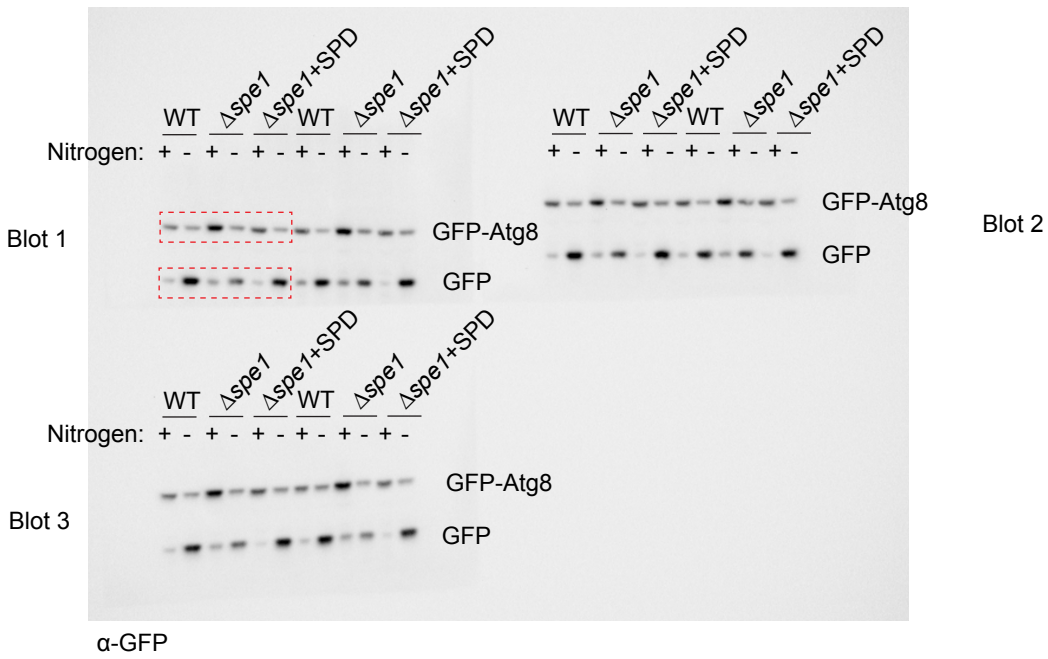

**Figure 3K**

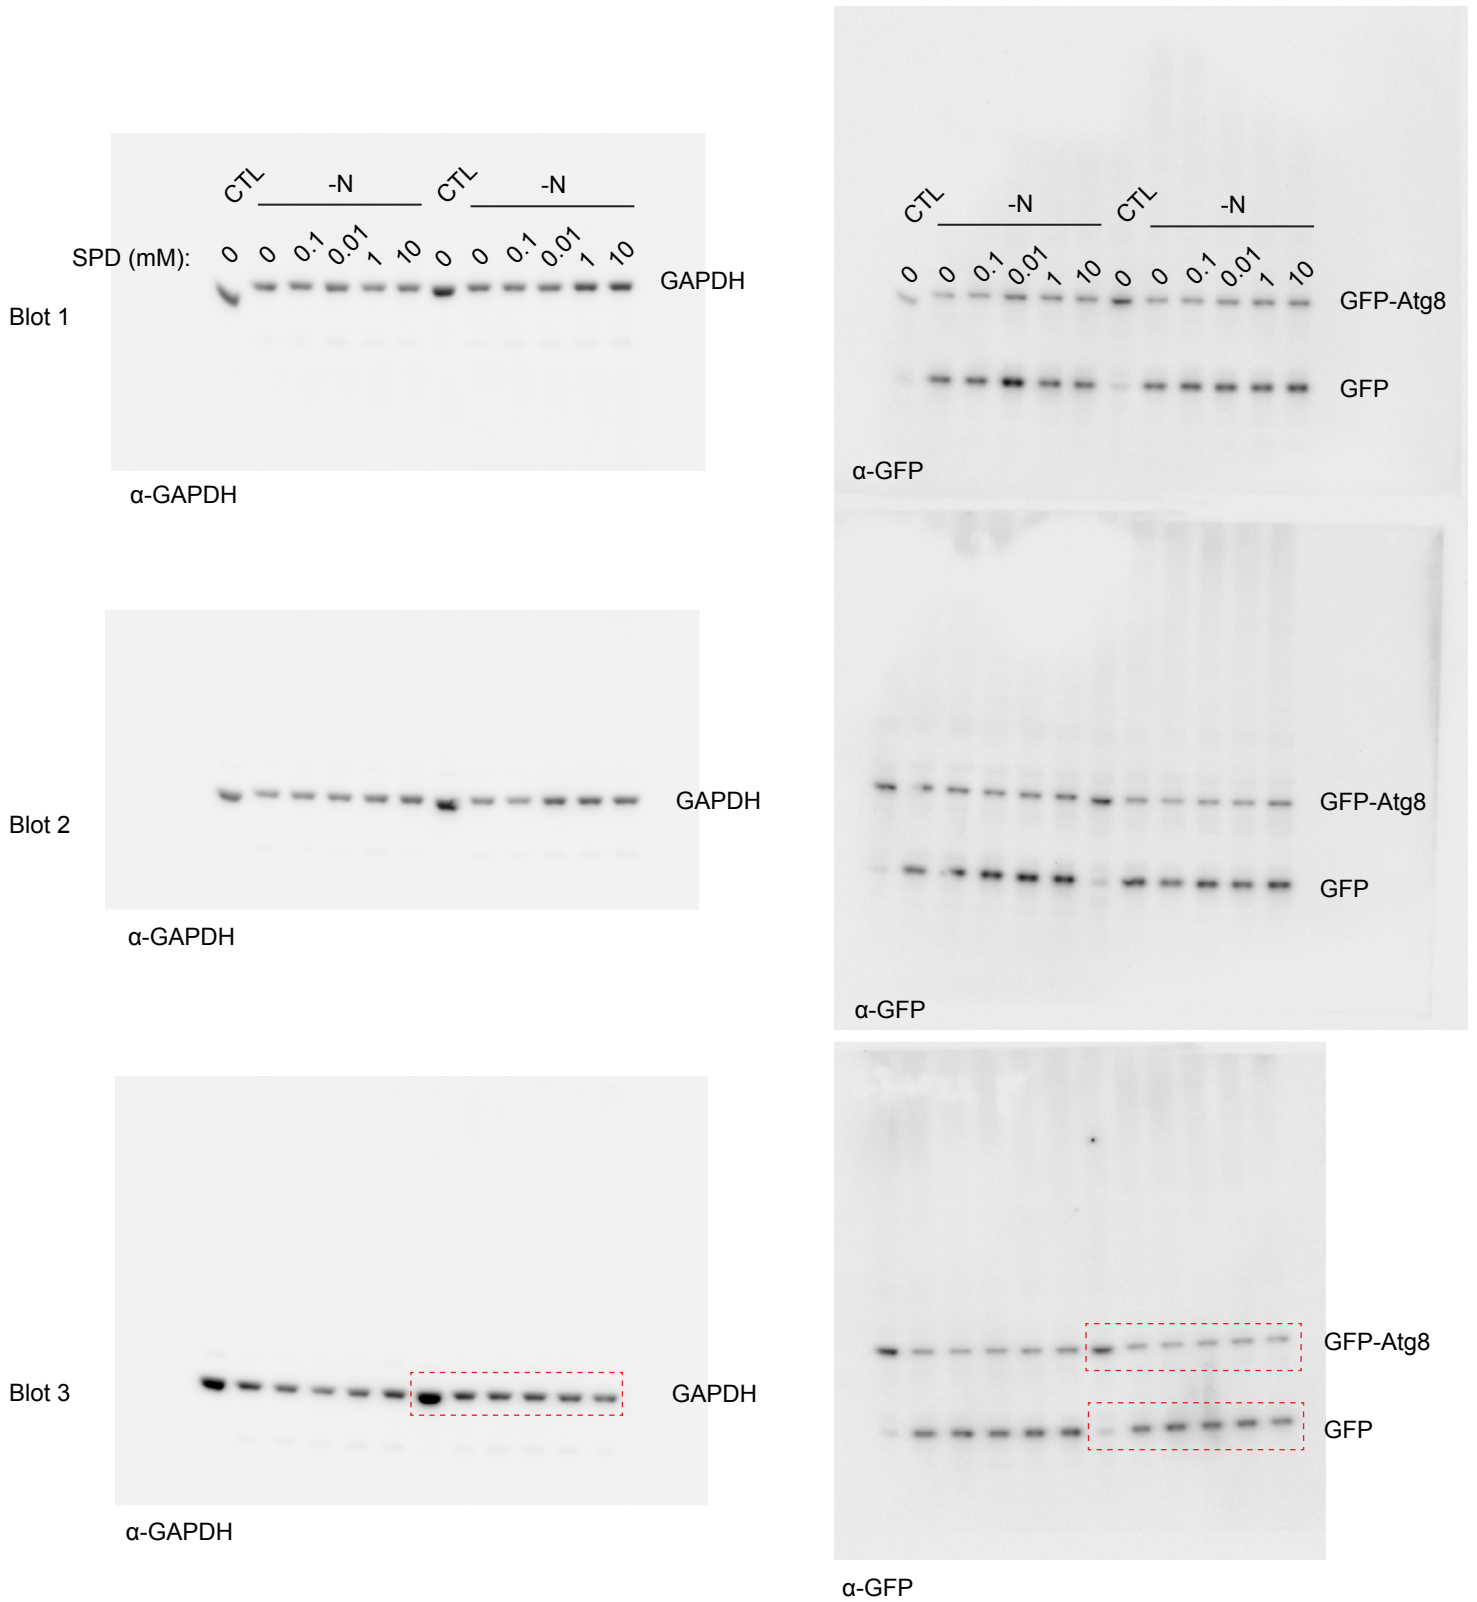

The lower parts of these blots were probed for α-hyposine in Extended Data Fig. 9E and therefore share the α-GAPDH images.
