# Supplementary material for: Spermidine is essential for fasting-mediated autophagy and longevity
Source: PubMed Central journal article supplement (PMC11392816; doi:10.1038/s41556-024-01468-x), 2024-08-08

**Figure 6B**

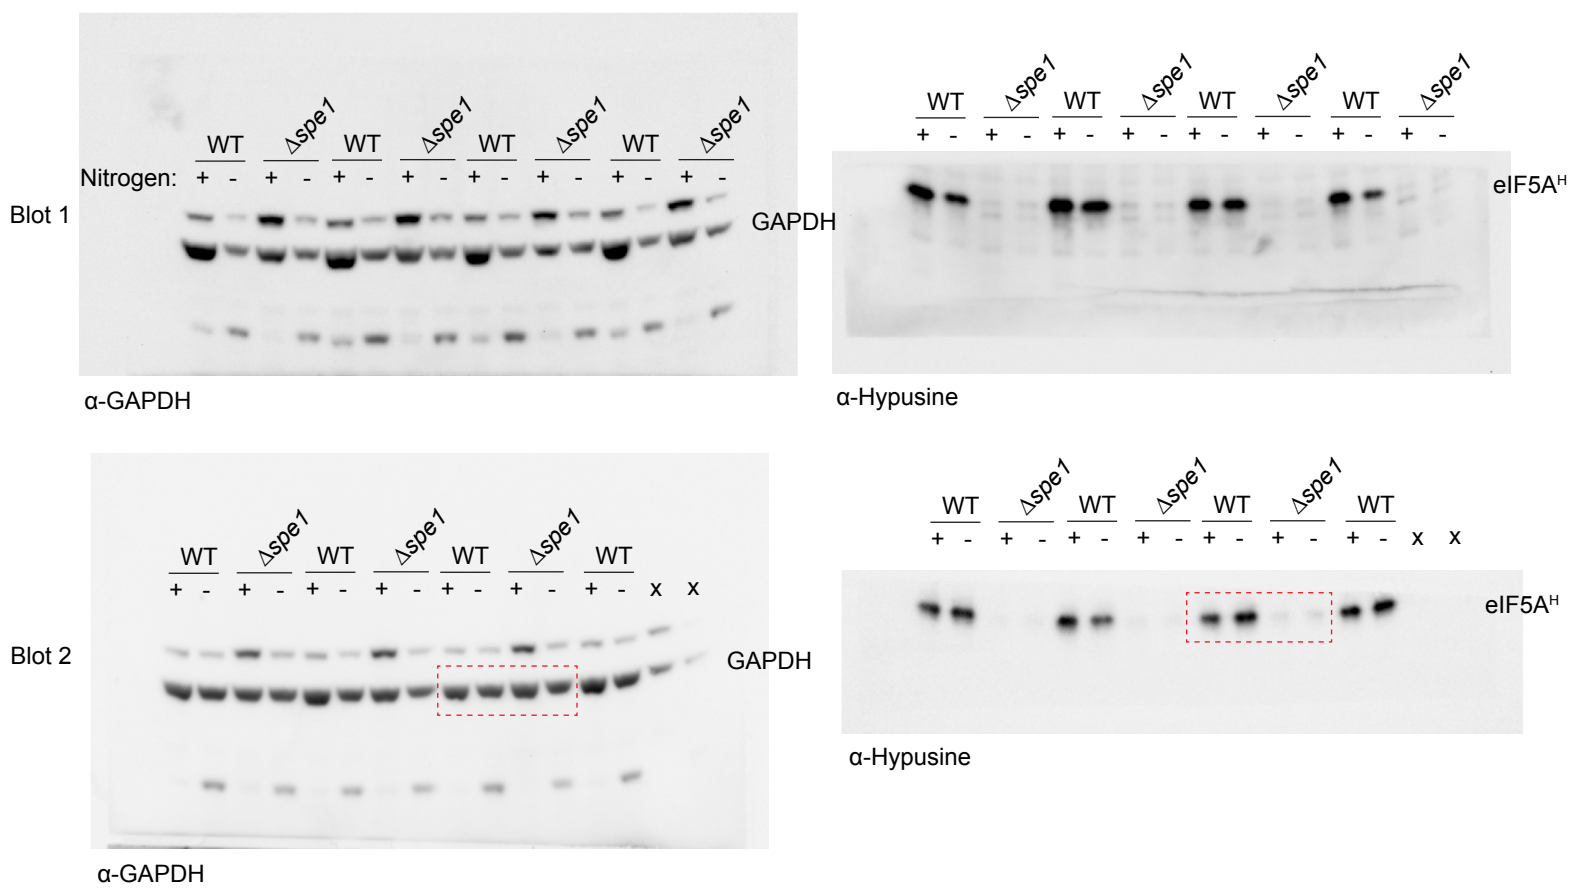

**Figure 6F**

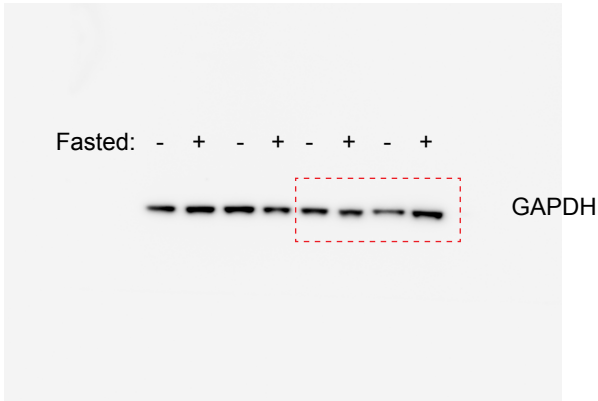

$\alpha$ -GAPDH

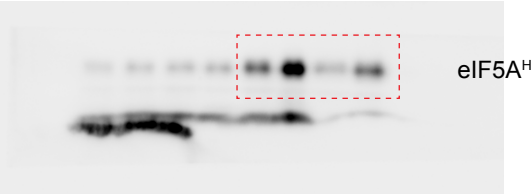

$\alpha$ -Hypusine

**Figure 6H**

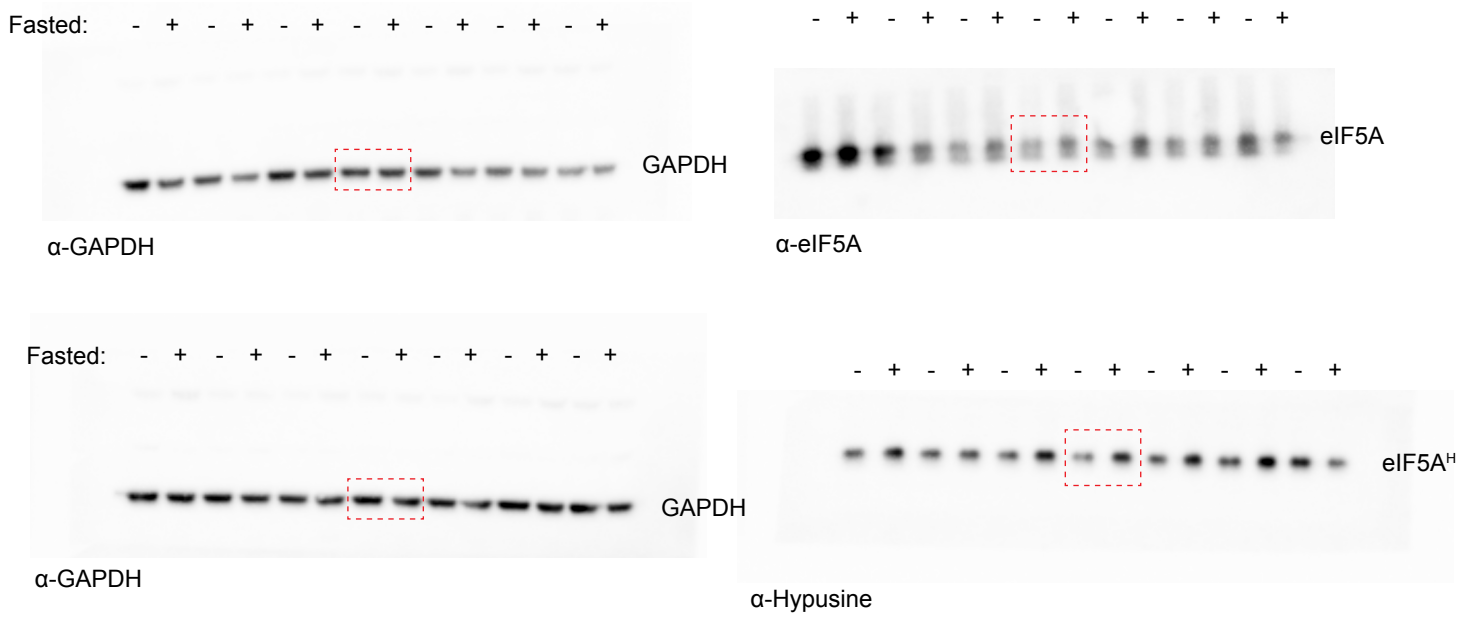

**Figure 6K**

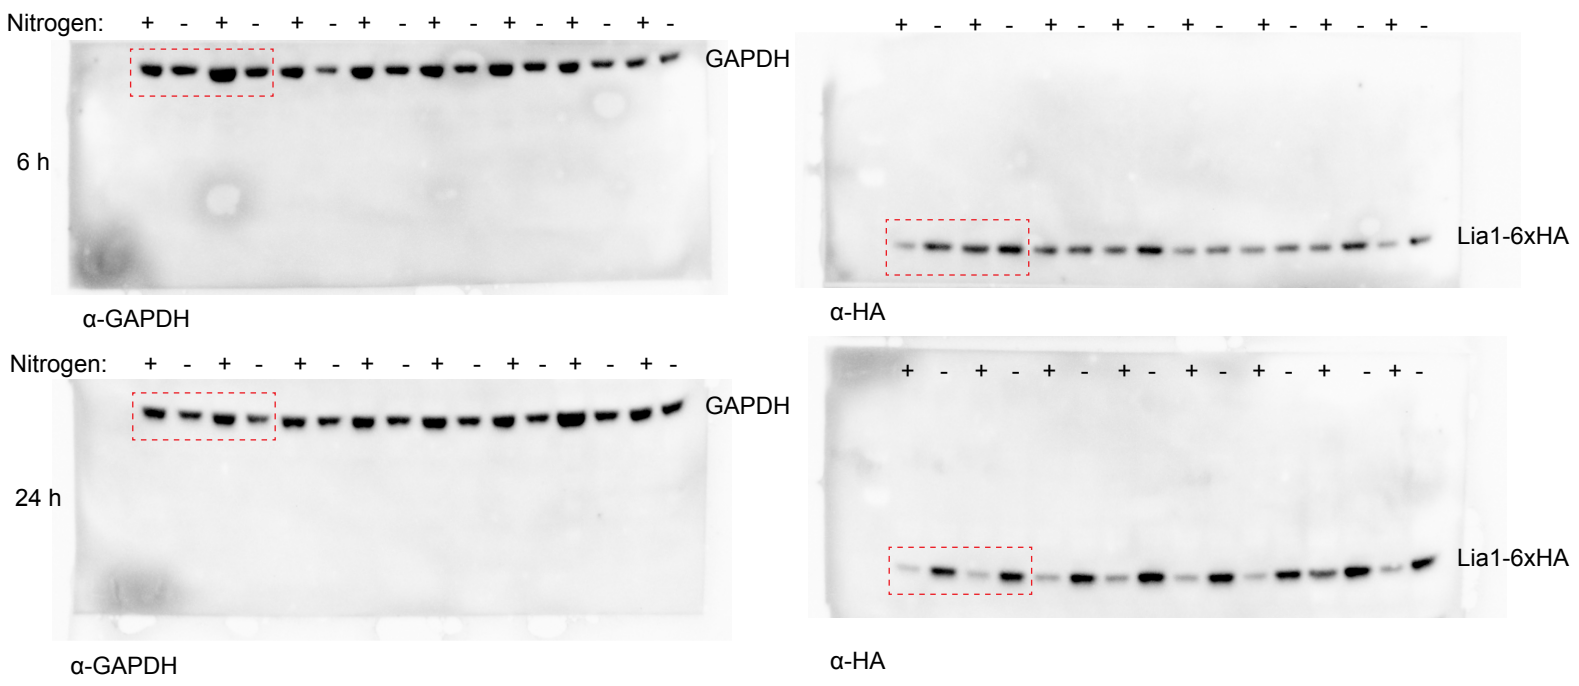

Supplement: 41556_2024_1468_MOESM18_ESM.pdf [file 41556_2024_1468_MOESM18_ESM.pdf]
