# Supplementary material for: Spermidine is essential for fasting-mediated autophagy and longevity
Source: PubMed Central journal article supplement (PMC11392816; doi:10.1038/s41556-024-01468-x), 2024-08-08

## Extended Data Figure 4A

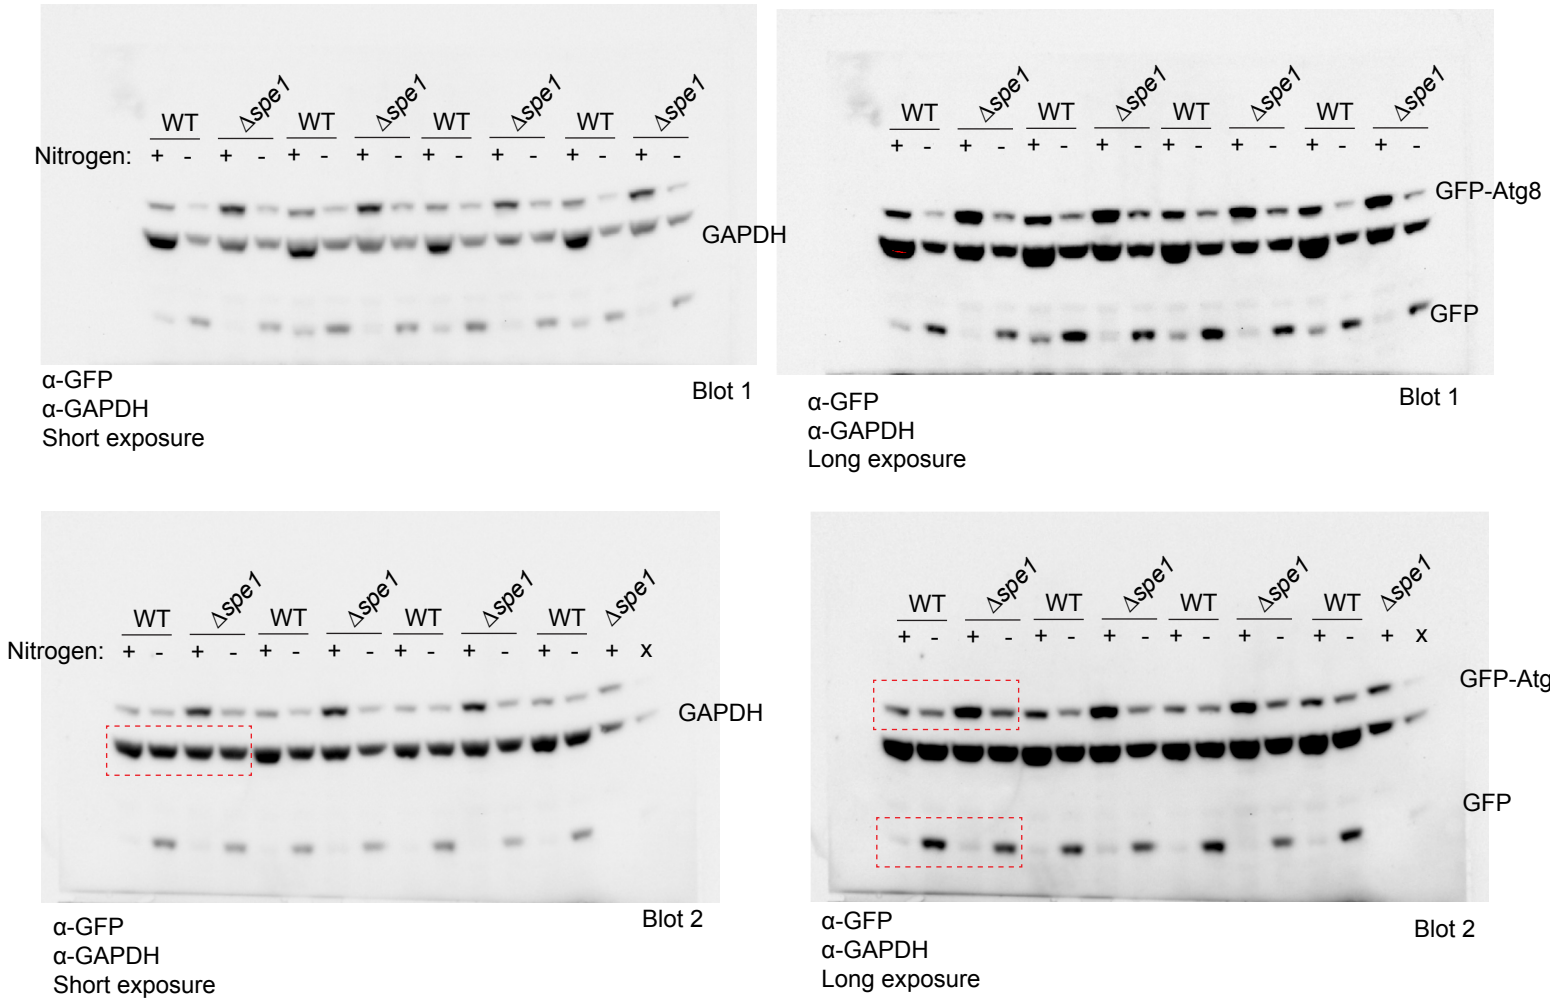

The lower parts of these blots were probed for  $\alpha$ -hypusine in Fig. 6B and therefore share the  $\alpha$ -GAPDH images.

### Extended Data Figure 4C

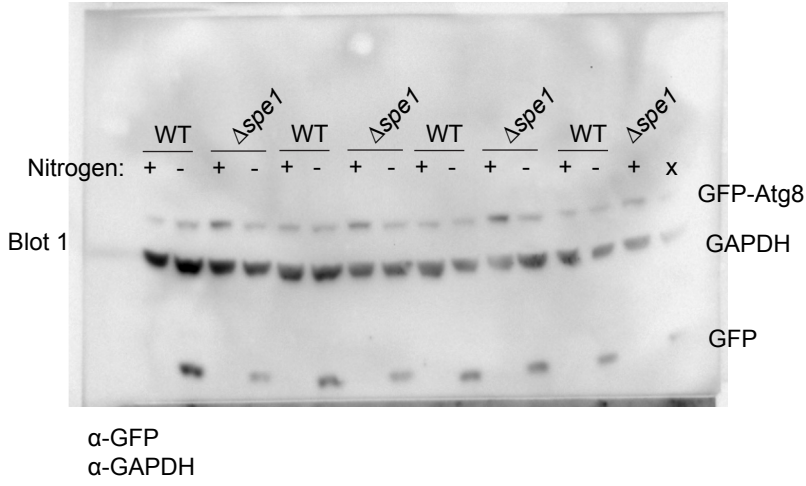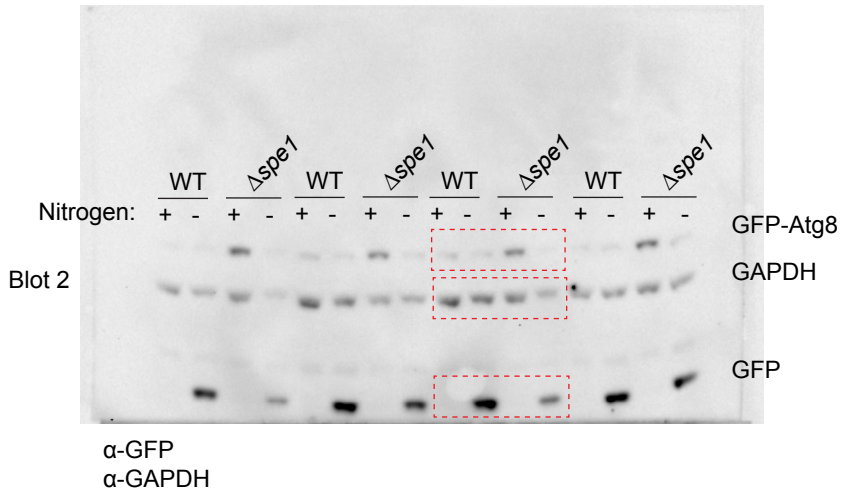

The lower parts of these blots were probed for  $\alpha$ -hypusine in Extended Data Fig. 9A and therefore share the  $\alpha$ -GAPDH images.

# Extended Data Figure 4I

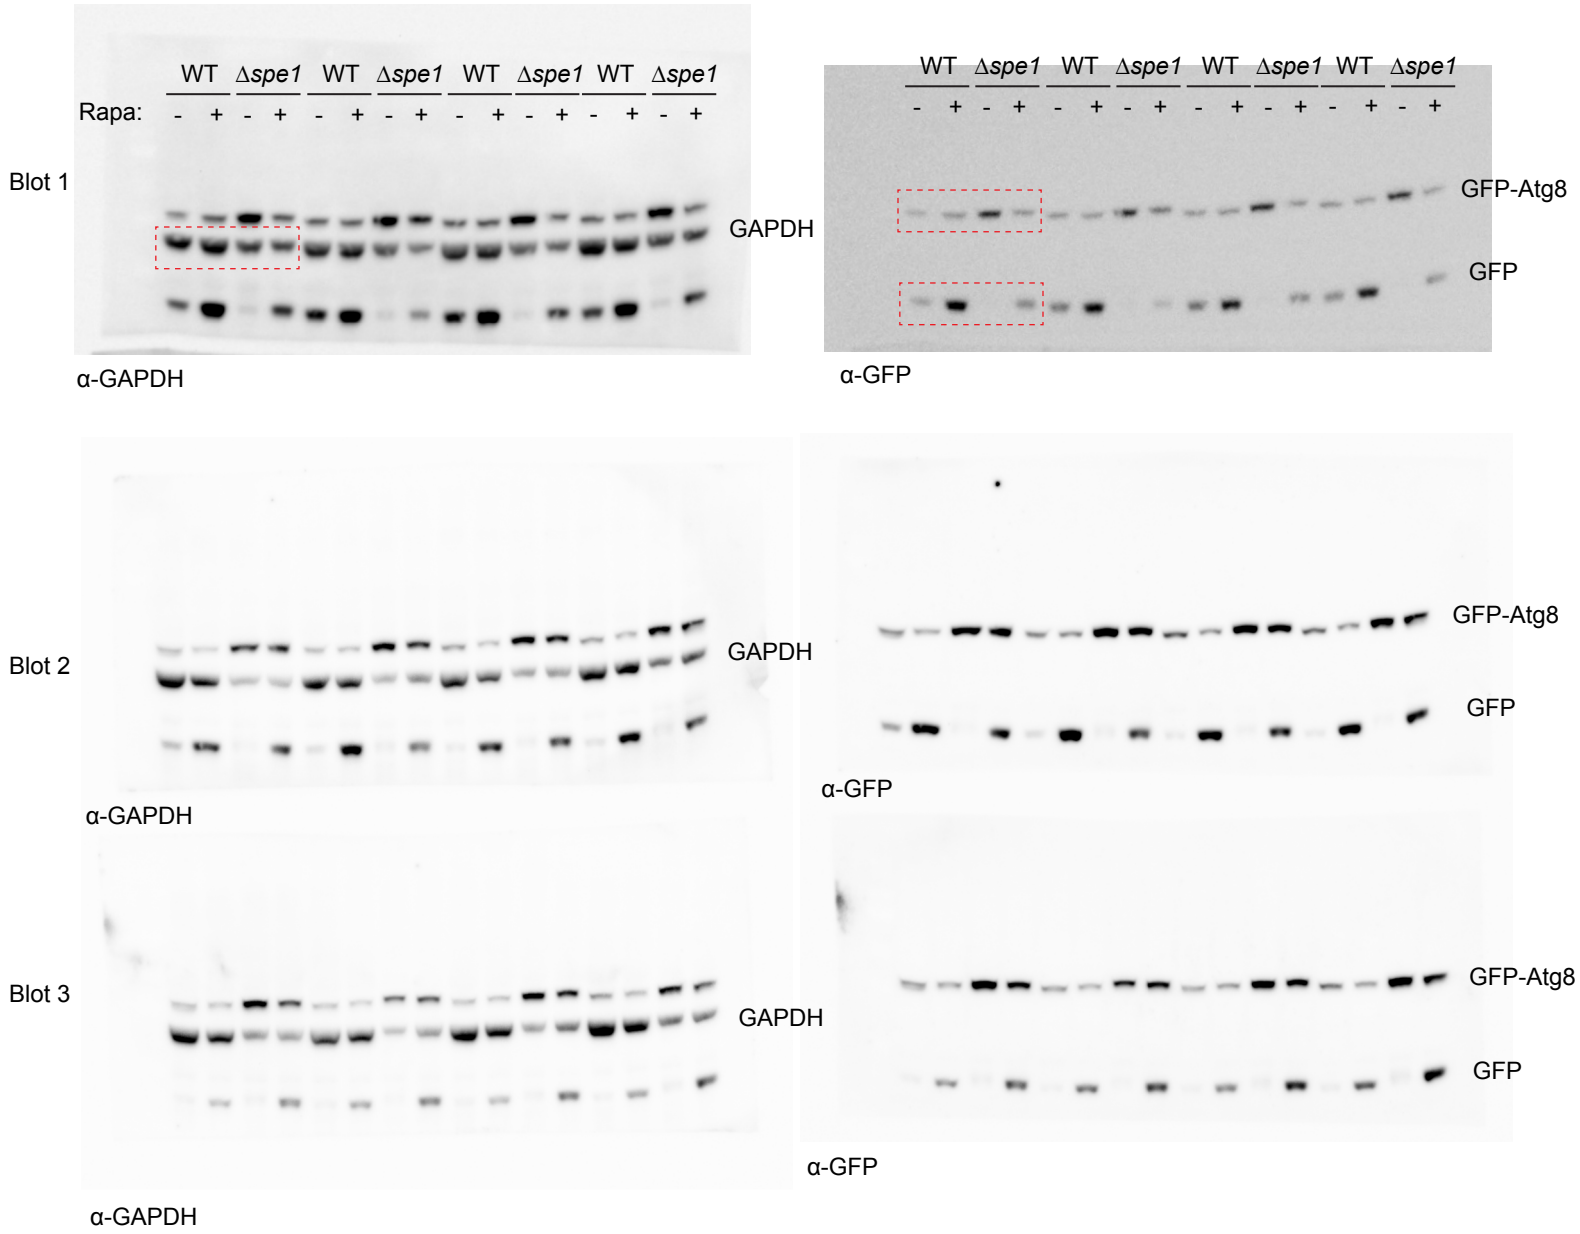

# Extended Data Figure 4M

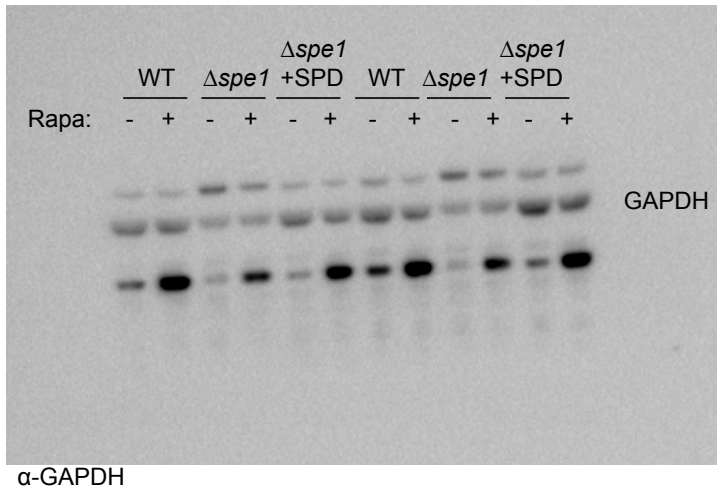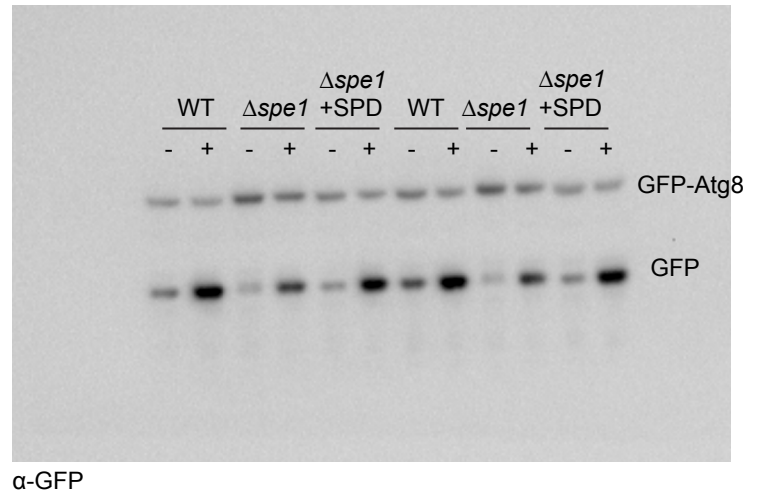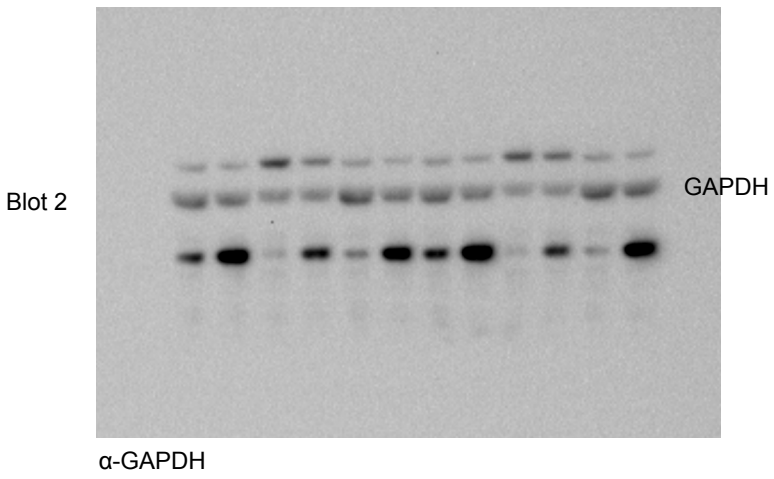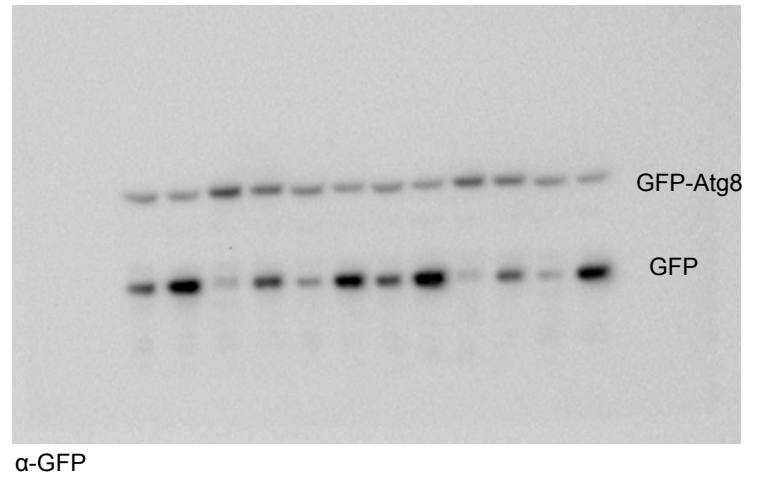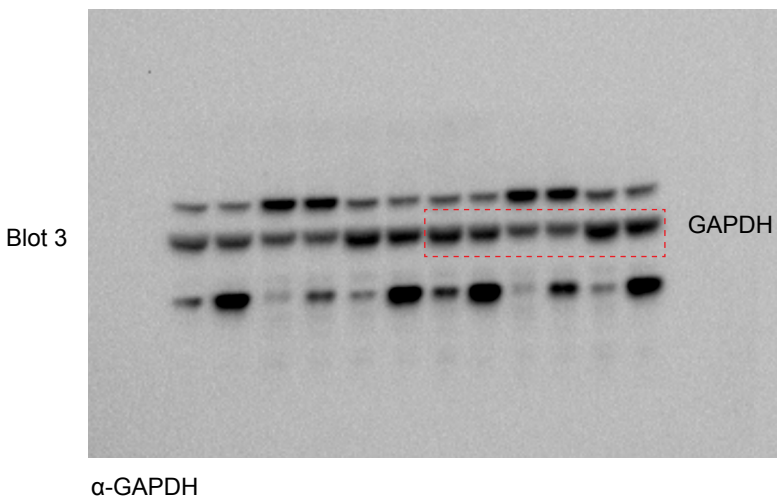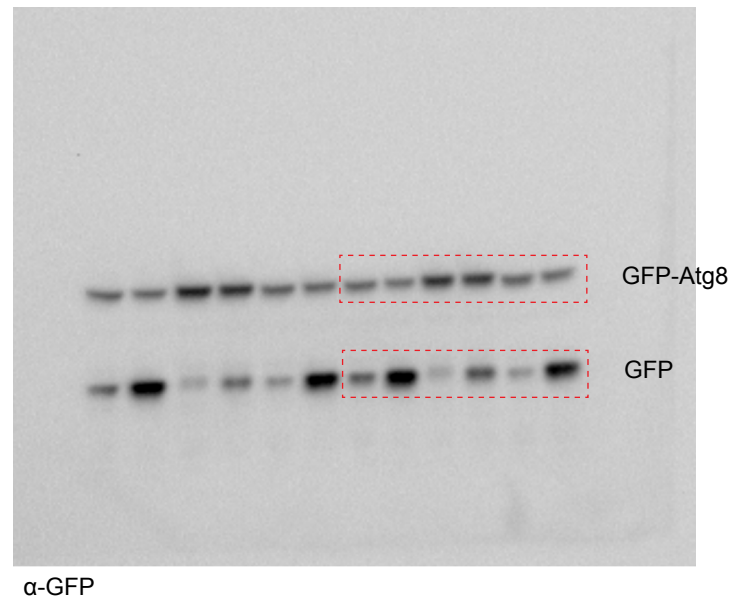

Supplement: 41556_2024_1468_MOESM23_ESM.pdf [file 41556_2024_1468_MOESM23_ESM.pdf]
