# Supplementary material for: Spermidine is essential for fasting-mediated autophagy and longevity
Source: PubMed Central journal article supplement (PMC11392816; doi:10.1038/s41556-024-01468-x), 2024-08-08
Supplement: 41556_2024_1468_MOESM29_ESM.pdf [file 41556_2024_1468_MOESM29_ESM.pdf]

## Extended Data Figure 9A

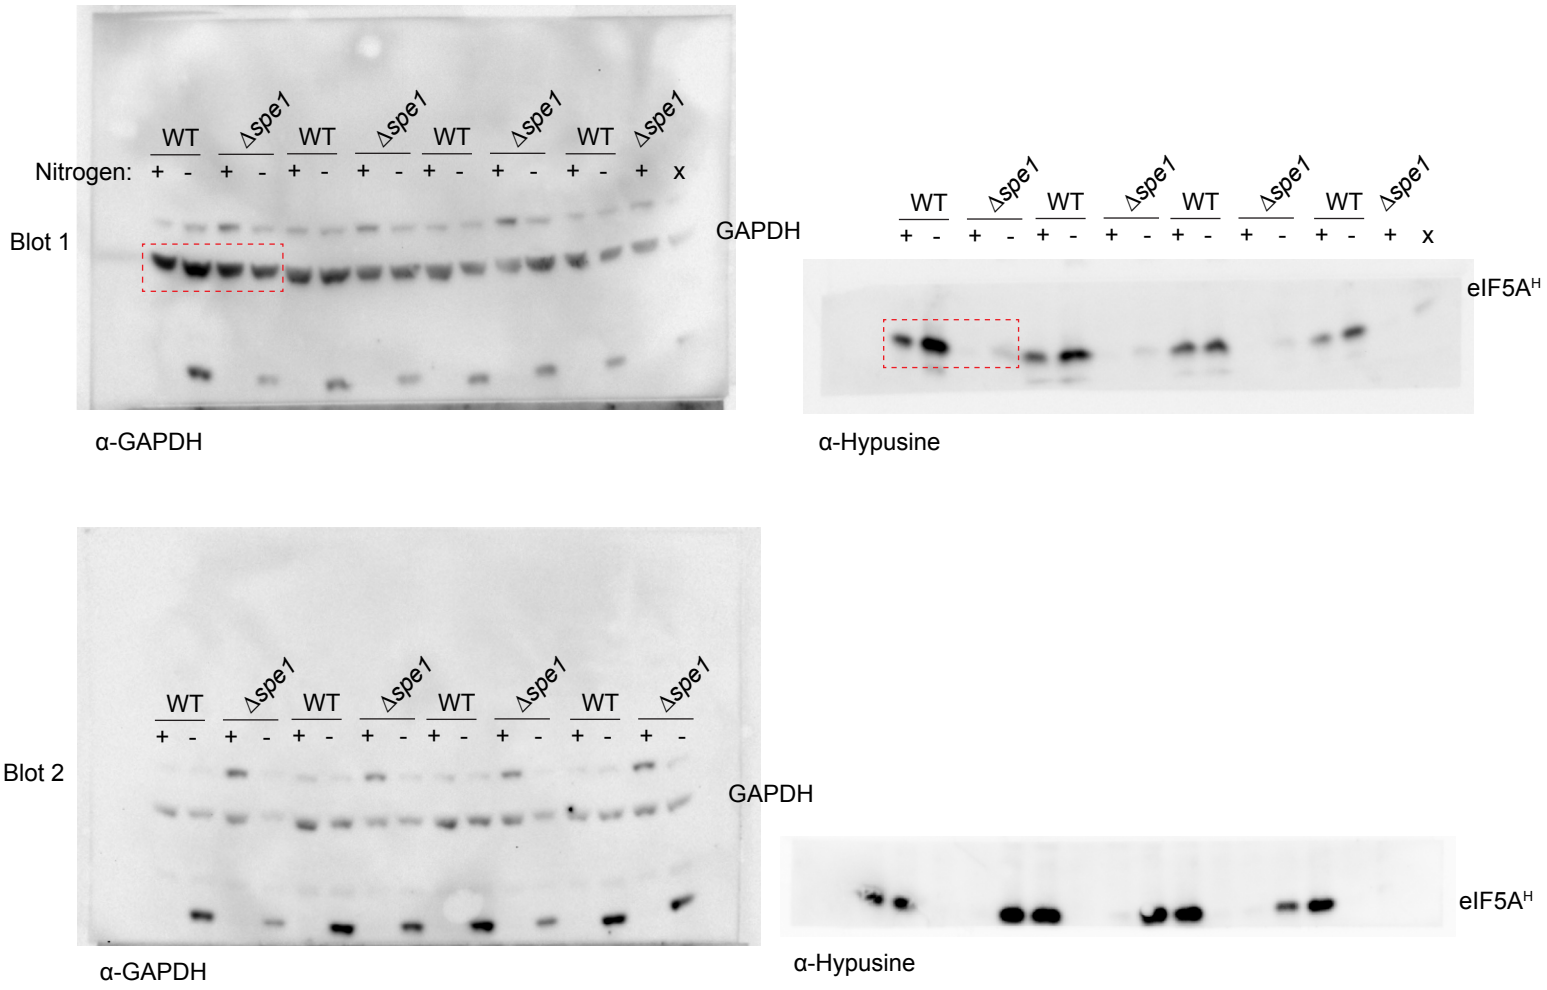

These blots were also probed for  $\alpha$ -GFP in Extended Data Fig. 4C and therefore share the  $\alpha$ -GAPDH images.

# Extended Data Figure 9C

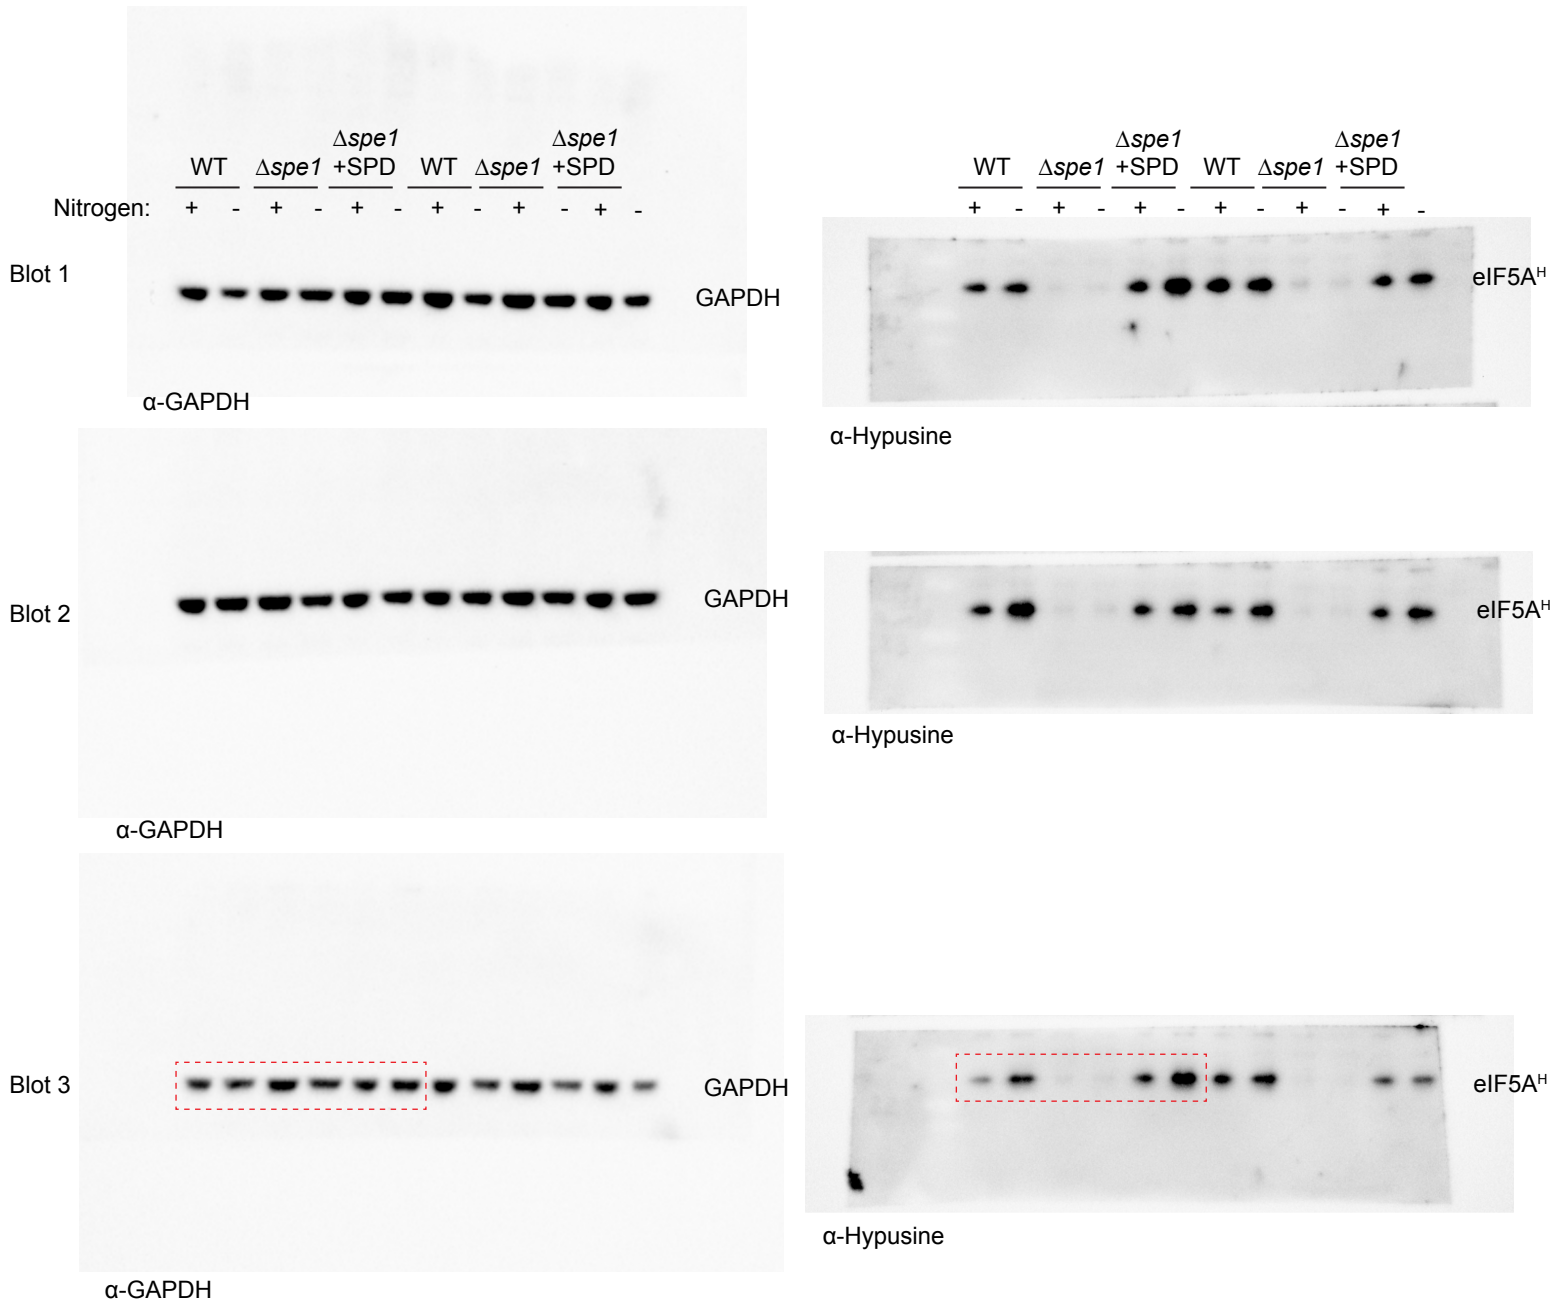

## Extended Data Figure 9E

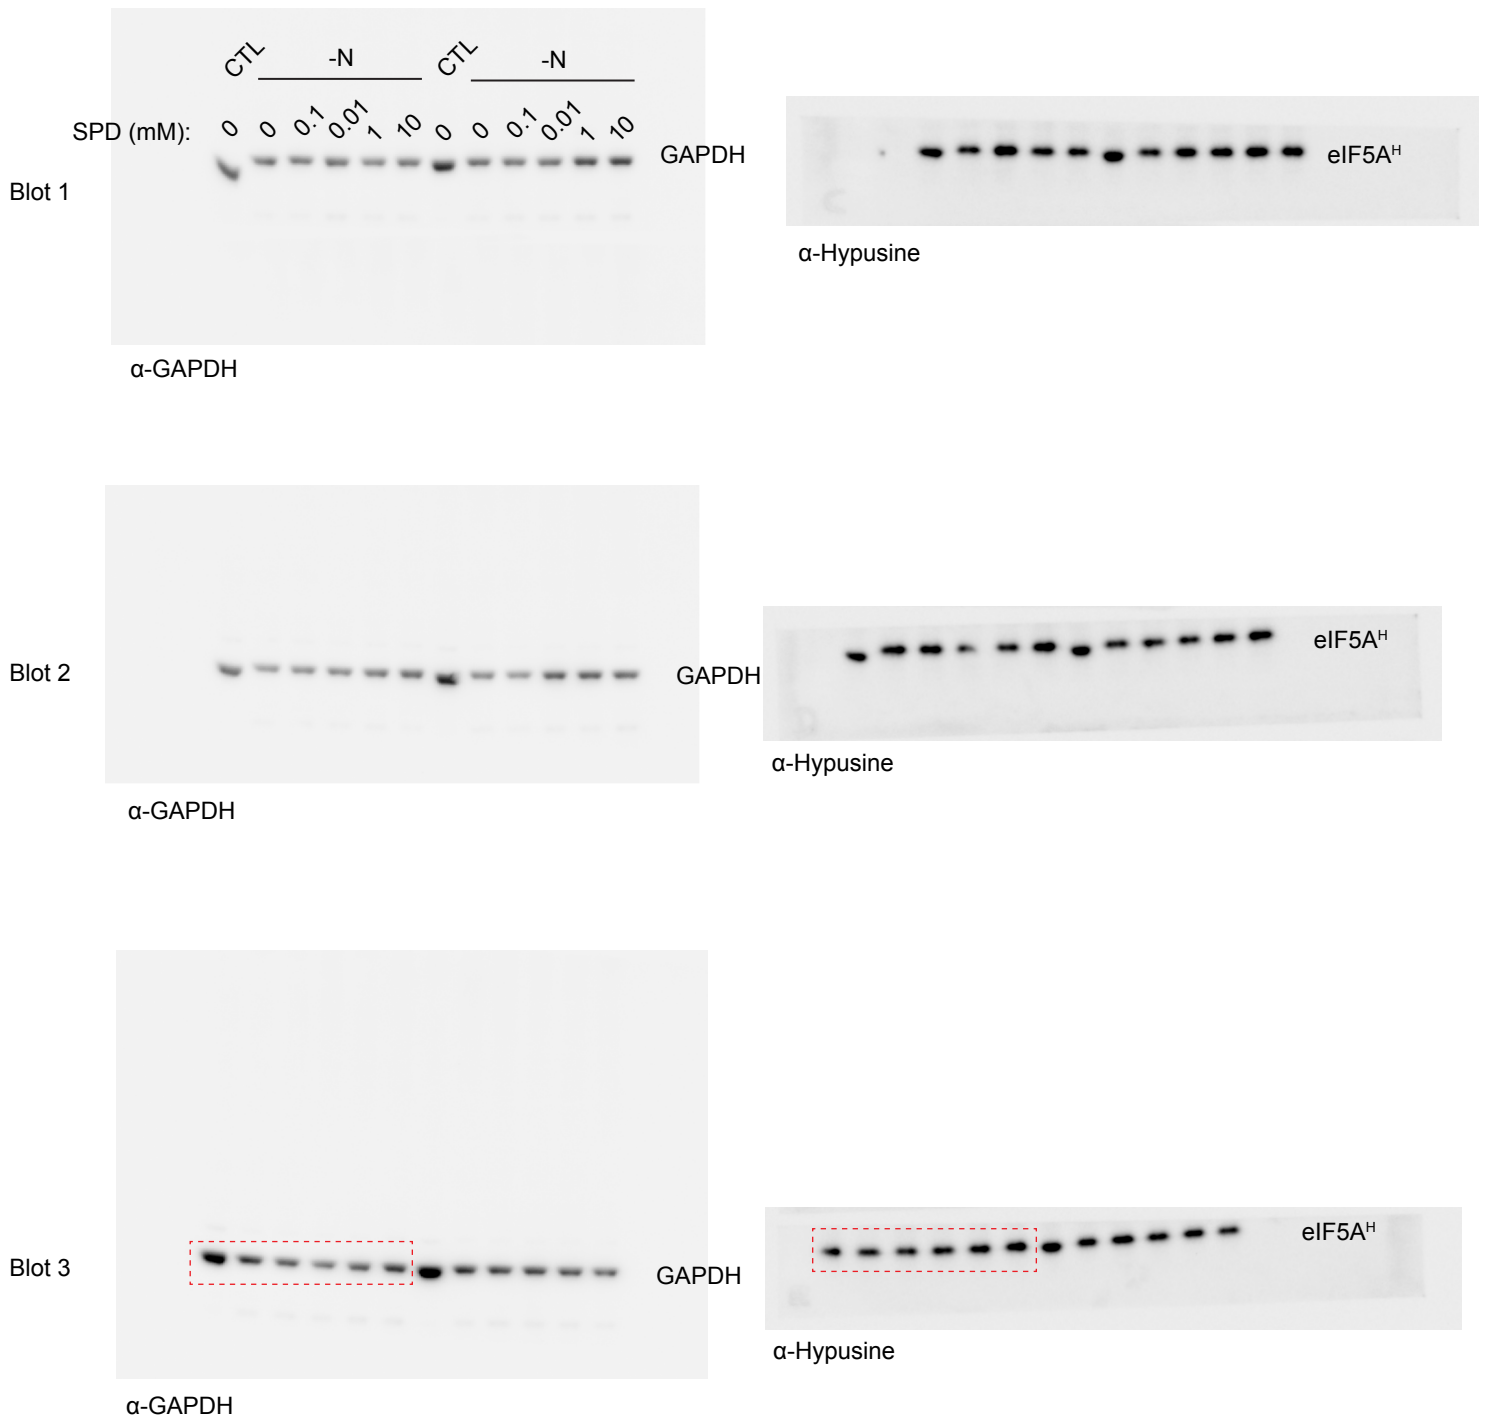

These blots were also probed for  $\alpha$ -GFP in Fig. 3K and therefore share the  $\alpha$ -GAPDH images.

# Extended Data Figure 9I

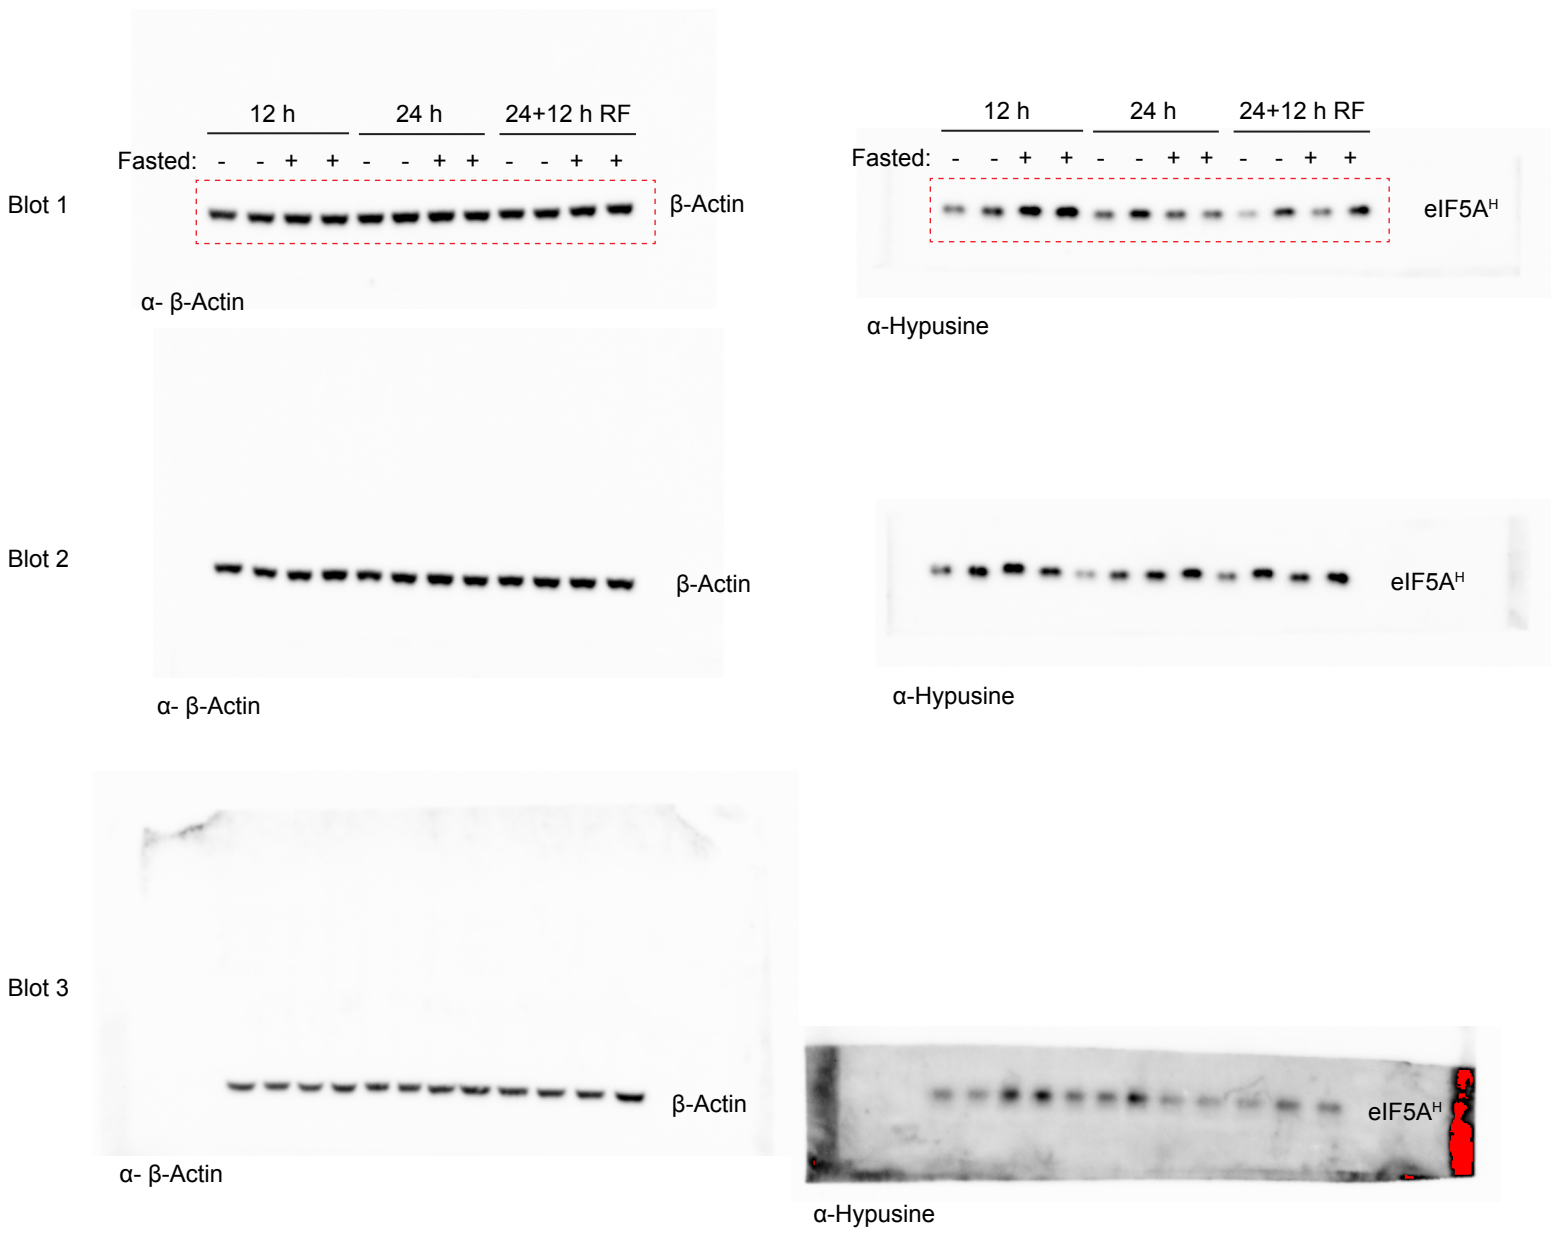

Extended Data Figure 9M

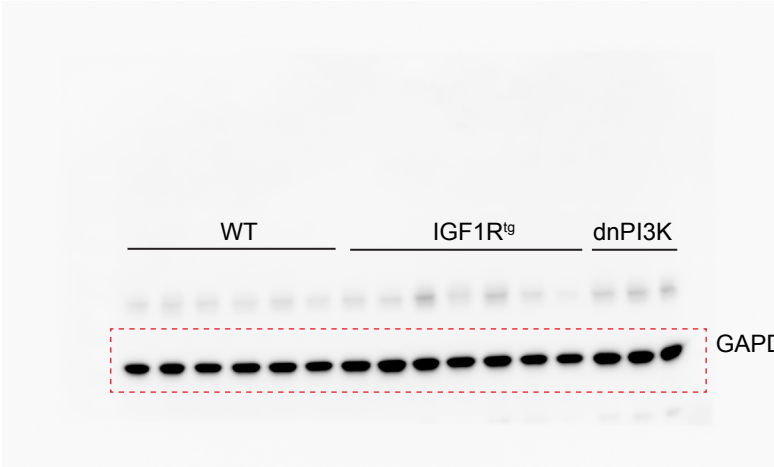

α-GAPDH

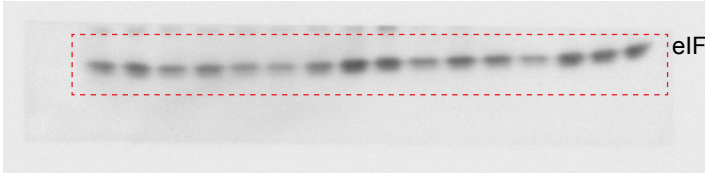

α-eIF5A

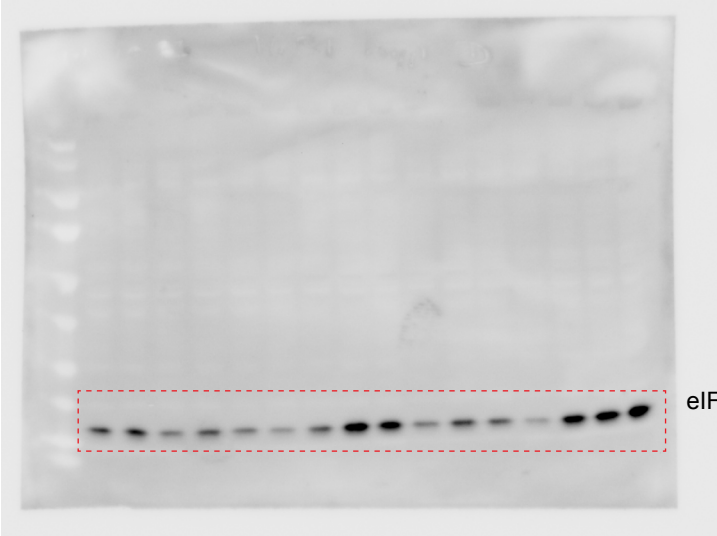

α-Hypusine

**Extended Data Figure 90**

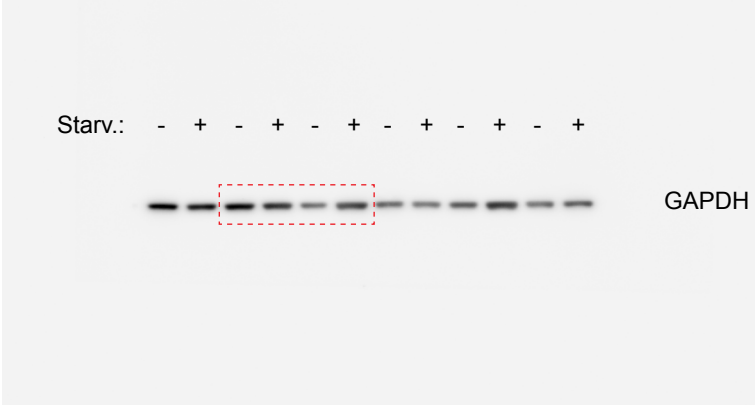

$\alpha$ -GAPDH

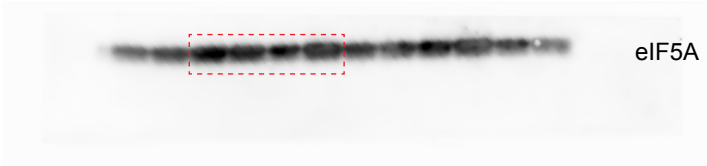

$\alpha$ -eIF5A

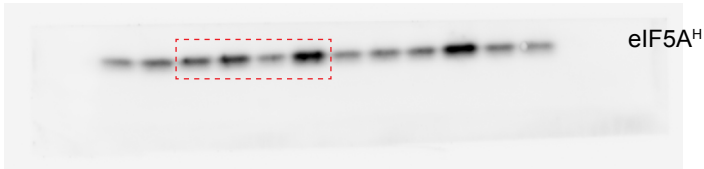

$\alpha$ -Hypusine
