# Supplementary material for: Spermidine is essential for fasting-mediated autophagy and longevity
Source: Nat Cell Biol. 2024 Aug 8;26(9):1571–84. doi: 10.1038/s41556-024-01468-x (PMC11392816; doi:10.1038/s41556-024-01468-x)
Supplement: Supplementary file 3 — Supplementary Tables 1–5. [file 41556_2024_1468_MOESM3_ESM.xlsx]

## Sheet: Supplementary Table 1
Supplementary Table 1: Summary of human cohorts analyzed in this study.
Abbreviations: BMI = body mass index, d = days, F/m = female/male, h = hours, PBMCs = peripheral blood mononuclear cells, RF = re-introduction of food.
Cohort	Registry ID	Study site	Sex (f/m)	Sample type	Previous publications	Fasting length	Fasting type	Age (median [min - max])	Baseline BMI (median [min - max])
1	DRKS00016657	Überlingen, Germany	68/41	Serum	Grundler et al. Food Chem Toxicol (2020), Wilhelmi de Toledo et al. Antioxidants (2020), Ravanidis et al. Food Chem Toxicol (2021)	7-13 d	Long-term fasting (approx. 250 kcal/day)	58	28
								(23-70)	(20.2-57.6)
2	DRKS00010111	Überlingen, Germany	40/23	Serum	Grundler et al. J Am Heart Assoc (2020), Toledo et al. PLOS ONE (2019), Grundler et al. Eur J Nutr (2021), Drinda et al. Nutrients (2019)	4-16 d	Long-term fasting (approx. 250 kcal/day)	61	26.4
								(38-79)	(20.6-42.3)
3	NCT02673515	Graz, Austria	2024-12-12	Plasma	Stekovic et al. Cell Metabolism (2019), Tripolt et al. Adv Ther (2018)	12-36 h	0 kcal during fasting	53.5	25.1
								(39-65)	(19.5-31)
4	NCT04739852	Berlin, Germany	2024-05-12	PBMCs	None	5+3 d RF	200-350 kcal/day	44	23.4
							(veg. broth and juices)	(23-77)	(20.1 – 28.6)

## Sheet: Supplementary Table 2
Supplementary Table 2: Statistics of the lifespan experiments.
Ad lib. = ad libitum, argn-1 = arginase, CTL = control, d = days, dhps-1 = deoxyhypusine synthase/homolog of DHS, eIF5A = eukaryotic translation initiation factor 5A-1, IF = intermittent fasting, LOF=loss of function, Odc1 = ornithine decarboxylase, smd-1 = SAM decarboxylase/ortholog of human adenosylmethionine decarboxylase 1, SPD = spermidine, spds-1 = spermidine synthase.
§ Log-rank tests with Bonferroni correction for multiple testing.
# Tested against each specific ad libitum control (genotype, RNAi or treatment).
Organism	Perturbation	Replicate	Group	N (animals)	Censored	Median lifespan (d)	Max. lifespan (d)	P vs. ad lib.§,#	P vs. Control IF or Rapa§
C. elegans	RNAi feeding: IF	1	CTL RNAi ad lib.	216	8	20	25
			CTL RNAi IF	168	6	25	36	<0.001
			odc-1(RNAi) ad lib.	183	12	20	25
			odc-1(RNAi) IF	181	14	22	33	<0.001	<0.001
			argn-1(RNAi) ad lib.	221	6	20	25
			argn-1(RNAi) IF	173	8	24	30	<0.001	<0.001
			spds-1(RNAi) ad lib.	188	5	16	25
			spds-1(RNAi) IF	191	11	24	30	<0.001	0.004
			smd-1(RNAi) ad lib.	203	13	18	25
			smd-1(RNAi) IF	197	14	24	30	<0.001	<0.001
			dhps-1(RNAi) ad lib.	199	4	20	27
			dhps-1(RNAi) IF	176	9	24	31	<0.001	<0.001
		2	CTL RNAi ad lib.	238	16	20	27
			CTL RNAi IF	198	10	24	37	<0.001
			odc-1(RNAi) ad lib.	240	8	20	29
			odc-1(RNAi) IF	217	11	18	26	1	<0.001
			argn-1(RNAi) ad lib.	215	4	18	25
			argn-1(RNAi) IF	168	7	18	28	0.14	<0.001
			spds-1(RNAi) ad lib.	208	0	17	24
			spds-1(RNAi) IF	176	6	20	29	<0.001	0.004
			smd-1(RNAi) ad lib.	186	9	18	26
			smd-1(RNAi) IF	164	8	22	32	<0.001	0.017
			dhps-1(RNAi) ad lib.	216	9	20	26
			dhps-1(RNAi) IF	184	4	18	29	1	<0.001
		3	CTL RNAi ad lib.	205	10	20	27
			CTL RNAi IF	167	9	25	37	<0.001
			odc-1(RNAi) ad lib.	155	20	20	25
			odc-1(RNAi) IF	174	7	24	32	<0.001	0.024
			argn-1(RNAi) ad lib.	223	20	20	27
			argn-1(RNAi) IF	186	10	24	31	<0.001	0.001
			spds-1(RNAi) ad lib.	234	8	18	24
			spds-1(RNAi) IF	168	13	22	32	<0.001	<0.001
			smd-1(RNAi) ad lib.	216	27	20	27
			smd-1(RNAi) IF	234	13	24	32	<0.001	<0.001
			dhps-1(RNAi) ad lib.	207	11	20	27
			dhps-1(RNAi) IF	219	5	20	30	0.252	<0.001
		4	CTL RNAi ad lib.	254	7	20	27
			CTL RNAi IF	217	16	25	38	<0.001
			odc-1(RNAi) ad lib.	216	6	20	27
			odc-1(RNAi) IF	207	20	22	30	<0.001	<0.001
			argn-1(RNAi) ad lib.	240	11	20	25
			argn-1(RNAi) IF	270	21	23	30	<0.001	<0.001
			spds-1(RNAi) ad lib.	251	2	17	25
			spds-1(RNAi) IF	211	15	22	32	<0.001	<0.001
			smd-1(RNAi) ad lib.	215	14	18	26
			smd-1(RNAi) IF	208	20	22	31	<0.001	<0.001
			dhps-1(RNAi) ad lib.	240	9	20	27
			dhps-1(RNAi) IF	197	14	22	30	<0.001	<0.001
	RNAi feeding: Rapamycin or IF + SPD	1	CTL RNAi ad lib.	155	12	21	30
			CTL RNAi IF	168	10	27	39	<0.001
			CTL RNAi ad lib.+SPD	177	7	24	36
			CTL RNAi IF+SPD	200	4	27	38	<0.001	0.059
			odc-1(RNAi) ad lib.	113	7	21	30
			odc-1(RNAi) IF	279	8	24	33	<0.001	<0.001
			odc-1(RNAi) ad lib.+SPD	145	9	22	33
			odc-1(RNAi) IF+SPD	266	6	27	35	<0.001	<0.001
			CTL RNAi ad lib.+Rapa	161	11	24	33	<0.001
			odc-1(RNAi) ad lib.+Rapa	147	2	22	31	<0.001	0.004
		2	CTL RNAi ad lib.	158	8	20	33
			CTL RNAi IF	207	12	26	42	<0.001
			CTL RNAi ad lib.+SPD	125	8	26	35
			CTL RNAi IF+SPD	100	6	26	41	0.03	1
			odc-1(RNAi) ad lib.	110	7	20	31
			odc-1(RNAi) IF	165	3	22	34	0.028	<0.001
			odc-1(RNAi) ad lib.+SPD	191	3	22	36
			odc-1(RNAi) IF+SPD	178	9	24	41	0.002	0.063
			CTL RNAi ad lib.+Rapa	134	10	24	35	<0.001
			odc-1(RNAi) ad lib.+Rapa	90	4	22	33	0.24	0.313
		3	CTL RNAi ad lib.	116	11	21	32
			CTL RNAi IF	148	8	28	39	<0.001
			CTL RNAi ad lib.+SPD	135	18	23	34
			CTL RNAi IF+SPD	166	12	28	40	<0.001	1
			odc-1(RNAi) ad lib.	107	14	21	33
			odc-1(RNAi) IF	131	7	23	33	0.265	<0.001
			odc-1(RNAi) ad lib.+SPD	161	17	23	35
			odc-1(RNAi) IF+SPD	131	16	25	35	0.202	0.013
			CTL RNAi ad lib.+Rapa	128	16	25	36	<0.001
			odc-1(RNAi) ad lib.+Rapa	93	13	23	33	0.655	0.086
D. melanogaster	DFMO feeding (female)	1	0mM DFMO ad lib.	112	4	65	84
			0mM DFMO IF	111	8	76	97	<0.001
			10mM DFMO ad lib.	112	5	66	89
			10mM DFMO IF	119	12	68	85	0.072	<0.001
		2	0mM DFMO ad lib.	203	9	65	84
			0mM DFMO IF	202	13	76	97	<0.001
			10mM DFMO ad lib.	215	6	66	89
			10mM DFMO IF	229	17	72	88	<0.001	<0.001
	DFMO feeding (male)	1	0mM DFMO ad lib.	113	8	50	75
			0mM DFMO IF	114	9	54	73	0.021
			10mM DFMO ad lib.	103	7	52	74
			10mM DFMO IF	117	6	53	81	0.694	0.16
		2	0mM DFMO ad lib.	97	8	47	69
			0mM DFMO IF	92	2	52	68	0.011
			10mM DFMO ad lib.	96	3	50	67
			10mM DFMO IF	95	6	52	62	0.17	0.01
	eIF5AK51R/+ (female)	1	+/+ ad lib.	76	1	63	77
			+/+ IF	80	22	69	79	<0.001
			eIF5AK51R/+ ad lib.	76	8	79	90
			eIF5AK51R/+ IF	77	4	80	92	0.398	<0.001
		2	+/+ ad lib.	97	0	56	71
			+/+ IF	88	3	66	78	<0.001
			eIF5AK51R/+ ad lib.	107	9	77	83
			eIF5AK51R/+ IF	98	9	78	88	0.02	<0.001
	eIF5AK51R/+ (male)	1	+/+ ad lib.	78	1	70	80
			+/+ IF	86	14	74	81	0.006
			eIF5AK51R/+ ad lib.	71	5	79	88
			eIF5AK51R/+ IF	74	10	69	88	0.017	1
		2	+/+ ad lib.	102	9	61	77
			+/+ IF	105	2	64	75	0.172
			eIF5AK51R/+ ad lib.	97	3	72	83
			eIF5AK51R/+ IF	90	3	68	83	0.138	0.004
	ODC1 LOF + SPD feeding	1	Odc1MI10996/+ ad lib.	119	14	73	86
			Odc1MI10996/+ IF	117	14	71	90	0.147
			Odc1MI10996/+ IF+SPD	113	16	79	94	<0.001	0.002

## Sheet: Supplementary Table 3
Supplementary Table 3: Echocardiographic parameters of fasted aged mice.
Abbreviations: BW, body weight; CI, cardiac index (calculated as the cardiac output divided by body surface area); E/e’, peak early filling Doppler velocity of transmitral flow (E) to corresponding myocardial tissue Doppler velocity (e’) ratio; HR, heart rate; IVSd, interventricular septum thickness during diastole; LVEF, left ventricular ejection fraction; LVFS, left ventricular fractional short…
Data show means ± standard deviation of the indicated number of mice per group.
§Two-way ANOVA with Holm-Šídák's multiple comparisons test, *P < 0.05 vs. respective ad libitum control.
	CTL		DFMO
	Ad lib.	IF16:8	Ad lib.	IF16:8	P values§
	(N = 13)	(N = 15)	(N = 9)	(N = 8)	Fasting	DFMO	Interaction
BW (g)	31.1±2.5	30.7±2.1	29.4±2.5	31.0±2.5	0.4237	0.3688	0.1674
HR (bpm)	509±76	506±56	533±41	511±43	0.4949	0.441	0.5985
IVSD (mm)	1.15±0.13	1.09±0.15	1.14±0.17	1.07±0.07	0.1276	0.7228	0.9698
LVIDd (mm)	4.16±0.32	4.08±0.33	3.92±0.38	4.21±0.45	0.3221	0.6311	0.1048
LVIDs (mm)	2.79±0.42	2.67±0.44	2.81±0.47	2.79±0.33	0.5946	0.6003	0.6851
LVPWd (mm)	0.96±0.15	0.88±0.11	0.93±0.19	0.94±0.12	0.4429	0.7138	0.2726
LVEF (%)	61±9	64±9	55±9	63±5	0.1142	0.2076	0.2664
LVFS (%)	33±7	35±7	29±6	34±4	0.0782	0.1565	0.415
CI (µl/min/cm2)	266±59	265±44	223±26	285±70*	0.0587	0.4159	0.0762
LV mass index (mg/cm2)	2.0±.0.3	1.8±0.3*	1.9±0.2	2.0±0.3	0.4127	0.7984	0.0414
LVRI (mg/mm)	44.2±.5.3	39.6±5.4	41.6±7.5	41.7±4.0	0.1969	0.8727	0.185
E/e’	44.5±.6.8	39.0±5.5*	44.2±8.0	44.0±1.7	0.1333	0.2167	0.1635

## Sheet: Supplementary Table 4
Supplementary Table 4: siRNAs for gene knockdown of human cells.
Gene	Catalog Number	Sequence
AHCY	J-009599-06	GGACCCAUCCAGACAAGUA
AHCY	J-009599-07	GCGAAACGGACGAGGAGUA
AHCY	J-009599-08	CAAGGUGCCUGCCAUCAAU
AHCY	J-009599-09	GCAUUGAGCAGACCCUGUA
AMD1	J-010053-09	GUAAAUGAGAUUAGCGUCU
AMD1	J-010053-10	CCUUGUGGGUAUUCGAUGA
AMD1	J-010053-11	UGGGAAAUGACUAGUAAUA
AMD1	J-010053-12	UGGUUUAUGCACAGUGUAA
ARG1	J-009922-06	GGACUGGACCCAUCUUUCA
ARG1	J-009922-07	GGGCGGAGACCACAGUUUG
ARG1	J-009922-08	GGGCUACUCUCAGGAUUAG
ARG1	J-009922-09	GAAGUAACUCGAACAGUGA
ARG2	J-009454-09	GGGACUAACCUAUCGAGAA
ARG2	J-009454-10	CAUGAGAGAUAUUGAUCGA
ARG2	J-009454-11	GAUAGUGAAUCCACGCUCA
ARG2	J-009454-12	GUUCAAUGGCUGCGAAAGA
ATG5	J-004374-07	GGCAUUAUCCAAUUGGUUU
ATG5	J-004374-08	GCAGAACCAUACUAUUUGC
ATG5	J-004374-09	UGACAGAUUUGACCAGUUU
ATG5	J-004374-10	ACAAAGAUGUGCUUCGAGA
ATG7	J-020112-05	CCAACACACUCGAGUCUUU
ATG7	J-020112-06	GAUCUAAAUCUCAAACUGA
ATG7	J-020112-07	GCCCACAGAUGGAGUAGCA
ATG7	J-020112-08	GCCAGAGGAUUCAACAUGA
BHMT	J-008422-07	GUUGAAACCUUGAUAGCAU
BHMT	J-008422-08	GGGCAUCCUAGAACGUUUA
BHMT	J-008422-09	CGACAUCGCCCGACAAGUG
BHMT	J-008422-10	UGAAGGAGAUGCUUUGGUA
CBS	J-008617-05	AGACGGAGCAGACAACCUA
CBS	J-008617-06	ACAGGACGGUGGUGGACAA
CBS	J-008617-07	GUGCGGAACUACAUGACCA
CBS	J-008617-08	GGAAGAAGUUCGGCCUGAA
CTH	J-003481-05	GUACAGGGAUGGUCACCUU
CTH	J-003481-06	GCACUCGGGUUUUGAAUAU
CTH	J-003481-07	CUACAUGUCCGAAUGGAAA
CTH	J-003481-08	GAGCUUGGGAGGAUUCGAA
DHPS	J-006670-05	CCACAUACUUGGGCGAGUU
DHPS	J-006670-06	UAAAGUGGACGCCUUCUAA
DHPS	J-006670-07	GAGAACGGGAUCAAUAGGA
DHPS	J-006670-08	GCAAGGAGAUCAACAACCC
DOHH	J-014712-09	GGGAAGAGGCUGACGUUAU
DOHH	J-014712-10	GGACAGGGGAGGAUUGCGA
DOHH	J-014712-11	CCAUGUUCGCCCUGCGCAA
DOHH	J-014712-12	GCAGAGCUUUGGCGUCUAA
EIF5A	J-015739-05	GAAGAUAUCUGCCCGUCAA
EIF5A	J-015739-06	CAUGUAAGAUCGUCGAGAU
EIF5A	J-015739-07	GUACGACUGUGGAGAAGAG
EIF5A	J-015739-08	GUAUUGACAUCUUUACUGG
EP300	J-003486-11	GGACUACCCUAUCAAGUAA
EP300	J-003486-12	GACAAGGGAUAAUGCCUAA
EP300	J-003486-13	GUUCAAUAAUGCCUGGUUA
EP300	J-003486-14	CGACAGGGAUGCAGCAACA
GNMT	J-010074-07	ACAAGUGGGUCAUCGAAGA
GNMT	J-010074-08	CAAGCAGCCUUCGGAGGUA
GNMT	J-010074-09	GGAUGACUCUGGACAAAGA
GNMT	J-010074-10	GAACAUCUACUAUAAGAGU
HADHA	J-009470-05	GGUUAUAUAUGCCGCAAUU
HADHA	J-009470-06	GGGCUAAAGACUAUACUUA
HADHA	J-009470-07	CGAAACAUGUGGCGGAAGA
HADHA	J-009470-08	GACAAGGGAUUGGUGGAAA
HADHB	J-008280-05	GCGACUGUCUUUAAUCUCU
HADHB	J-008280-06	GAAGCUUUCUCGGGUCAGA
HADHB	J-008280-07	CAAAAUGGGCCCUCAGAUU
HADHB	J-008280-08	GUUAUAAGCCGAAGGCAUA
MAT2A	J-008818-05	GAAAGUGGUUCGUGAAGCU
MAT2A	J-008818-06	GUGUUCAUCUUGACAGAAA
MAT2A	J-008818-07	GACCAGGGCUUAAUGUUUG
MAT2A	J-008818-08	GAAAGGAUUAUACCAAGGU
MTAP	J-009539-05	GGACAAUGGUCACAAUCGA
MTAP	J-009539-06	CGAGAGAGGUUCUUAUAGA
MTAP	J-009539-07	GCGAUAUUGUCAUUAUUGA
MTAP	J-009539-08	GGAAUUUGUUACGCAAGUA
MTR	J-009896-05	CUGAGAAGCUCUUACGUUA
MTR	J-009896-06	CAGCCUAUGUCCUCUGUUA
MTR	J-009896-07	GAUCAAGGAAGUUUGCUAA
MTR	J-009896-08	UGCAAUAAUUUCCGAGUUA
ODC1 (a)	J-006668-05	CGAAAGAGCUAAAUAUCGA
ODC1 (b)	J-006668-06	GAGCAGACCUUUAUGUAUU
ODC1 (c)	J-006668-07	ACAAAUACUUUCCGUCAGA
ODC1 (d)	J-006668-08	CGGCUAGUAUUAAUGUGUA
PAOX	J-008470-09	UGGAGACUCUGUCGGAUGA
PAOX	J-008470-10	GCUAUCAAGGACUCACAAA
PAOX	J-008470-11	GGACACAUAAAGCAAGUUA
PAOX	J-008470-12	CAGUGUCGGUAGAGUGUGA
SAT1	J-010382-05	CGUGAUGAGUGAUUAUAGA
SAT1	J-010382-06	GGACACAGCAUUGUUGGUU
SAT1	J-010382-07	UUGCAGAAGUGCCGAAAGA
SAT1	J-010382-08	GAACAAGUAAUCUUAACUG
SIRT1	J-003540-09	GCAAAGGAGCAGAUUAGUA
SIRT1	J-003540-10	GCGAUUGGGUACCGAGAUA
SIRT1	J-003540-11	GGAUAGGUCCAUAUACUUU
SIRT1	J-003540-12	CCACCUGAGUUGGAUGAUA
SMOX	J-009493-13	UGAGGAAUUCAGCGAUUUA
SMOX	J-009493-14	GAGCAGGGUUUCACGGAUG
SMOX	J-009493-15	UCAUUGAGAUGUACCGAGA
SMOX	J-009493-16	CCGUGUGCAGAGUGUGAAA
SMS	J-017273-07	GGAGGCAUAUUGUGUGAAA
SMS	J-017273-08	UGACGAAGAUUCACCUUAU
SMS	J-017273-09	GAGAGUGAUUUGGCAUAUA
SMS	J-017273-10	CAGAAGCACUGUCGCUCUA
SRM	J-006669-05	AGUCCGUGGUCCAGUGUGA
SRM	J-006669-06	CAGAUCGGCUUCAUGCUGU
SRM	J-006669-07	CAGGAUGCCUUCGACGUGA
SRM	J-006669-08	GAAGACAGCCCUCAAGGAA
ULK1	J-005049-05	CAGCAUCACUGCCGAGAGG
ULK1	J-005049-06	CCACGCAGGUGCAGAACUA
ULK1	J-005049-07	GCACAGAGACCGUGGGCAA
ULK1	J-005049-08	UCACUGACCUGCUCCUUAA
ON-TARGETplus Cyclophilin Control	D-001820-01	ACAGCAAAUUCCAUCGUGU
ON-TARGETplus Cyclophilin Control	D-001820-12	GAAAGAGCAUCUACGGUGA
ON-TARGETplus Cyclophilin Control	D-001820-13	GAAAGGAUUUGGCUACAAA
ON-TARGETplus Cyclophilin Control	D-001820-14	GGAAAGACUGUUCCAAAAA
ON-TARGETplus Non-targeting Control	D-001810-01	UGGUUUACAUGUCGACUAA
ON-TARGETplus Non-targeting Control	D-001810-02	UGGUUUACAUGUUGUGUGA
ON-TARGETplus Non-targeting Control	D-001810-03	UGGUUUACAUGUUUUCUGA
ON-TARGETplus Non-targeting Control	D-001810-04	UGGUUUACAUGUUUUCCUA

## Sheet: Supplementary Table 5
Supplementary Table 5: Primers for gene expression analysis of human cells.
Gene	Forward primer	Reverse primer
ARG1	TCATCTGGGTGGATGCTCACAC	GAGAATCCTGGCACATCGGGAA
OAZ1	CTCCACTGCTGTAGTAACCCG	GATCCCTCTGACTATTCCCTCG
ODC1	TTTACTGCCAAGGACATTCTGG	GGAGAGCTTTTAACCACCTCAG
SRM	GTGGTGGCCTATGCCTACTG	CTCCTGGAAGTTCGTGCTCG
SMS	TAGTGGGGATGTTAATTTGGCAG	CCACACGTTTTTCGCATGTATTT
PAOX	GGACTGCACCTTTTCTAAGGG	GGACCCGTTCCAGTGGATG
SAT1	ACCCGTGGATTGGCAAGTTAT	TGCAACCTGGCTTAGATTCTTC
MAT2A	ATGAACGGACAGCTCAACGG	CCAGCAAGAAGGATCATTCCAG
AMD1	AGTCGGGTAATCAGTCAGCCA	ACTCTCACGAGTGACATCCTTT
GNMT	CTGGGGTGGACTCCATTATGC	GATGACCCACTTGTCGAAGGC
ATP13A2	AGGGACATCAATAGATCCCCTC	CACGACGTGATAGCCGATGA
ATP13A3	ATGGTTACAATTTGAGTCGCTGG	AAAGAACGCGAATTTTTGCACA
MYC	GTCAAGAGGCGAACACACAAC	TTGGACGGACAGGATGTATGC
YAP	TAGCCCTGCGTAGCCAGTTA	TCATGCTTAGTCCACTGTCTGT
TAZ	GATCCTGCCGGAGTCTTTCTT	CACGTCGTAGGACTGCTGG
DHPS	TTCCTGGGATATACATCCAACCT	AATACGTCCACCATGTTGTGC
DOHH	ATGCTGGTGGACGTGCTGCAAG	GTCCGAGGAATACTGCTTCAGG
EIF5A	GGACTTCGAGACAGGAGATGC	TCATTCCTTTTGATGTTGGGGAC
